# Supplementary material for: Synthesis of 2-hydroxymalonic acid derivatives via tandem oxidation and rearrangement by photo organic catalysis
Source: Royal Society of Chemistry journal article supplement (doi:10.1039/c6ra07084a), 2016-01-01
Supplement: c6ra07084a1.pdf [file c6ra07084a1.pdf]

## Supporting Information

### Synthesis of 2-hydroxymalonic acid derivatives via tandem oxidation and rearrangement by singlet oxygen

Akifumi Okada,<sup>a</sup> Yoshitomo Nagasawa,<sup>a</sup> Tomoaki Yamaguchi,<sup>a</sup> Eiji Yamaguchi,<sup>a</sup>  
Norihito Tada,<sup>a</sup> Tsuyoshi Miura<sup>b</sup> and Akichika Itoh<sup>\*a</sup>

*Gifu Pharmaceutical University 1-25-4, Daigaku-nishi, Gifu 501-1196, Japan, <sup>a</sup> and Tokyo University of Pharmacy and Life Sciences, 1432-1 Horinouchi, Hachioji, Tokyo 192-0392, Japan <sup>b</sup>*

itoha@gifu-pu.ac.jp

|                                                                     |     |
|---------------------------------------------------------------------|-----|
| 1. General Information                                              | S-2 |
| 2. Materials                                                        | S-3 |
| 3. General Experimental Procedure                                   | S-3 |
| 4. Synthesis of Methyl 3- <i>n</i> -butyl-2-hydroxy-3-oxopropanoate | S-3 |
| 5. Characterization of the products                                 | S-3 |
| 6. References                                                       | S-6 |

Appendix: <sup>1</sup>H, <sup>13</sup>C NMR

## 1. General Information

All dry solvents were obtained from Kanto Kagaku Co., Ltd. Other chemicals used were of reagent grade and were obtained from Aldrich Chemical Co., Tokyo Kasei Kogyo Co., Ltd. and Wako Pure Chemical Industries, Ltd.  $^1\text{H}$  NMR and  $^{13}\text{C}$  NMR spectra were obtained on a JEOL ECA 500 spectrometer (500 MHz for  $^1\text{H}$  NMR and 125 MHz for  $^{13}\text{C}$  NMR) or JEOL AL 400 spectrometer (400 MHz for  $^1\text{H}$  NMR and 100 MHz for  $^{13}\text{C}$  NMR) at room temperature in  $\text{CDCl}_3$  as a solvent. Chemical shifts ( $\delta$ ) are reported in parts per million (ppm) downfield from internal  $\text{Me}_4\text{Si}$ . High-resolution mass spectra (HRMS) were obtained on a JEOL JMS-T100TD and are reported as  $m/z$  ( $\text{M}+\text{Na}^+$ , relative intensity). Thin-layer chromatography (TLC) was carried out on precoated plates of silica gel (MERCK, silica gel F-254, 0.5 mm). Flash column chromatography was performed with Kanto silica gel 60N (Spherical, Neutral, 40-50 mm) and Biotage Isolera® automated chromatography system using normal phase cartridges with YMC\*GEL SIL (YMC Co., Ltd., 25  $\mu\text{m}$ ). IR spectra were recorded on a Perkin Elmer Spectrum 100 FTIR spectrometer and are reported in terms of frequency of absorption ( $\text{cm}^{-1}$ ). Irradiation of visible light was performed with a 22 W fluorescent lamp (daylight color lamp, EFR25ED 22W from Panasonic Co., Ltd. as shown detailed in the bellow (Figure S-1 and Figure S-2)).

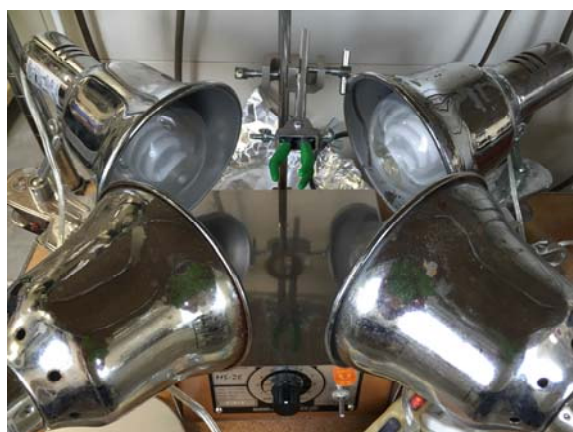

**Figure S-1.** The appearance of the fluorescent lamps

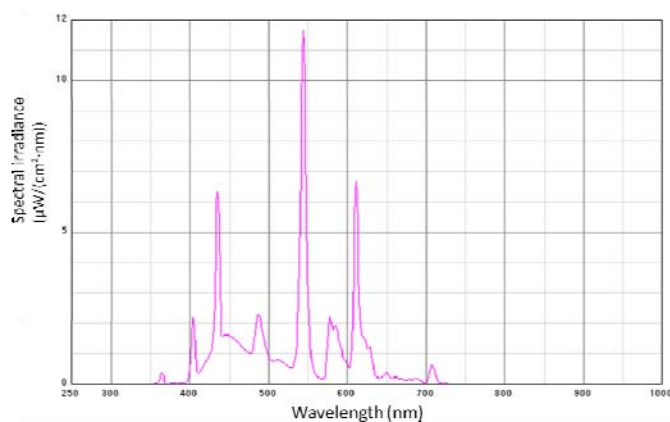

**Figure S-2.** The wavelength of the fluorescent lamp

## 2. Materials

Methyl 3-(4-nitrophenyl)-3-oxopropanoate (**1e**) were prepared from ethyl 3-(4-nitrophenyl)-3-oxopropanoate according to the literature.<sup>1</sup> **1j** was prepared from amine according to the literature.<sup>2</sup>

## 3. General Experimental Procedure

A dry methanol solution (5 mL) of **1a** (0.3 mmol), methylene blue (2.0 mol%) and Ca(OH)<sub>2</sub> (0.1 equiv) in a Pyrex test tube (diameter: 15mm, height: 145mm) equipped with an O<sub>2</sub> balloon, was irradiated with stirring condition for 10 h with four 22 W fluorescent lamps, which was set from the test tube in the distance of 80 mm. The crude product was analyzed by <sup>1</sup>H NMR with 1,1,2,2-tetrachloroethane as the internal standard for determination of the NMR yields. The reaction mixture was concentrated under the reduced pressure. The pure product **2a** was obtained in 80% yield (49.0 mg) after column chromatography.

## 4. Synthesis of Methyl 3-*n*-butyl-2-hydroxy-3-oxopropanoate (**3a**)

A dry methanol solution (5 mL) of **1a** (0.3 mmol), methylene blue (2.0 mol%), Ca(OH)<sub>2</sub> (0.1 equiv) and P(OEt)<sub>3</sub> (1.0 equiv) in a Pyrex test tube equipped with an O<sub>2</sub> balloon, was irradiated with stirring condition for 10 h with four 22 W fluorescent lamps, which was set from the test tube in the distance of 80 mm. The reaction mixture was concentrated under the reduced pressure. This reaction was performed three times, then methyl 3-*n*-butyl-3,3-dimethoxy-2-hydroxypropanoate was obtained (total 30.6 mg) after column chromatography. A chloroform solution (3 mL) of this product and TFA (0.1 equiv) in flask was stirred for 10 minutes at 0 °C. The reaction mixture was concentrated under the reduced pressure. **3a** was obtained in 4% yield (6.7 mg) after column chromatography.

## 5. Spectral Data of Compounds

### Dimethyl 2-butyl-2-hydroxymalonate (**2a**)<sup>3</sup>

<sup>1</sup>H NMR (400 MHz, CDCl<sub>3</sub>) δ 3.81 (s, 6H), 3.82 (s, 1H), 2.05-2.01 (m, 2H), 1.35-1.25 (m, 4H), 0.90 (t, *J* = 7.2 Hz, 3H).

<sup>13</sup>C NMR (100 MHz, CDCl<sub>3</sub>) δ 171.0, 79.0, 53.3, 34.6, 25.2, 22.5, 13.8.

R<sub>f</sub> = 0.20 (hexane:ether = 3:1).

Yield: 80% (49.0 mg)

**Dimethyl 2-ethyl-2-hydroxymalonate (2b)**<sup>4</sup>

<sup>1</sup>H NMR (400 MHz, CDCl<sub>3</sub>) δ 3.82 (s, 6H), 2.07 (q, *J* = 7.5 Hz, 2H), 0.91 (t, *J* = 7.5 Hz, 3H).

<sup>13</sup>C NMR (100 MHz, CDCl<sub>3</sub>) δ 171.0, 79.4, 53.3, 28.1, 7.4.

HRMS: *m/z* (DART) calcd for C<sub>7</sub>H<sub>13</sub>O<sub>5</sub> [M+H]<sup>+</sup>: 177.0763 found 177.0770.

IR (ATR): 3941, 2959, 1735, 1438, 1225, 1156, 1119, 1089, 1006, 803 (cm<sup>-1</sup>).

R<sub>f</sub> = 0.20 (hexane:ether = 3:1).

Yield: 60% (31.8 mg)

**Dimethyl 2-hydroxy-2-propylmalonate (2c)**

<sup>1</sup>H NMR (400 MHz, CDCl<sub>3</sub>) δ 3.81 (s, 6H), 3.73 (s, 1H), 2.03-1.99 (m, 2H), 1.36-1.30 (m, 2H), 0.94 (t, *J* = 7.5 Hz, 3H).

<sup>13</sup>C NMR (100 MHz, CDCl<sub>3</sub>) δ 171.0, 79.0, 53.3, 36.9, 16.5, 13.9.

HRMS: *m/z* (DART) calcd for C<sub>8</sub>H<sub>15</sub>O<sub>5</sub> [M+H]<sup>+</sup>: 191.0919, found 191.0913.

IR (ATR): 3505, 2980, 2960, 1738, 1723, 1428, 1294, 1249, 1215, 1117, 935, 806, 599 (cm<sup>-1</sup>).

R<sub>f</sub> = 0.20 (hexane:ether = 3:1).

Yield: 79% (45.2 mg)

**Dimethyl 2-hydroxy-2-isopropylmalonate (2d)**<sup>3</sup>

<sup>1</sup>H NMR (400 MHz, CDCl<sub>3</sub>) δ 3.82 (s, 6H), 3.66 (s, 1H), 2.65 (sep, *J* = 6.8 Hz, 1H), 0.92 (d, *J* = 6.8 Hz, 6H).

<sup>13</sup>C NMR (100 MHz, CDCl<sub>3</sub>) δ 170.9, 82.3, 53.3, 33.4, 16.4.

R<sub>f</sub> = 0.20 (hexane:ether = 3:1).

Yield: 82% (47.0 mg)

**Dimethyl 2-hydroxy-2-(4-nitrophenyl)malonate (2e)**<sup>3</sup>

<sup>1</sup>H NMR (400 MHz, CDCl<sub>3</sub>) δ 8.24 (d, *J* = 9.2 Hz, 2H), 7.89 (d, *J* = 9.2 Hz, 2H), 4.50 (s, 1H), 3.88 (s, 6H).

<sup>13</sup>C NMR (100 MHz, CDCl<sub>3</sub>) δ 169.2, 148.0, 142.1, 128.0, 123.0, 79.6, 54.2.

R<sub>f</sub> = 0.30 (hexane:ethyl acetate = 3:2).

Yield: 74% (60.1 mg)

**Dimethyl 2-hydroxy-2-(pyridine-3-yl)malonate (2f)<sup>3</sup>**

<sup>1</sup>H NMR (400 MHz, CDCl<sub>3</sub>) δ 8.91 (s, 1H), 8.56 (d, *J* = 4.5, 1H), 8.00 (dt, *J* = 8.3, 1.9 Hz, 1H), 7.30 (dd, *J* = 8.3, 4.8 Hz, 1H), 3.82 (s, 6H).

<sup>13</sup>C NMR (100 MHz, CDCl<sub>3</sub>) δ 169.6, 149.4, 148.2, 134.7, 132.0, 122.9, 78.8, 54.0.

R<sub>f</sub> = 0.32 (hexane:ethyl acetate = 1:3).

Yield: 34% (25.9 mg)

**Methyl 2-hydroxy-2-methyl-3-(dimethylamino)-3-oxopropanoate (2g)**

<sup>1</sup>H NMR (500 MHz, CDCl<sub>3</sub>) δ 4.86 (s, 1H), 3.81 (s, 3H), 3.03 (s, 3H), 2.96 (s, 3H), 1.63 (s, 3H).

<sup>13</sup>C NMR (125 MHz, CDCl<sub>3</sub>) δ 172.2, 170.2, 75.1, 53.0, 37.2, 22.9.

HRMS: *m/z* (DART) calcd for C<sub>7</sub>H<sub>14</sub>NO<sub>4</sub> [M+H]<sup>+</sup>: 176.0922, found 176.0919.

IR (ATR): 3512, 2925, 1740, 1636, 1396, 1257, 1157, 1088, 970 (cm<sup>-1</sup>).

R<sub>f</sub> = 0.50 (hexane:ethyl acetate = 2:1).

Yield: 59% (31.2 mg)

**Methyl 2-hydroxy-2-methyl-3-(diethylamino)-3-oxopropanoate (2h)**

<sup>1</sup>H NMR (400 MHz, CDCl<sub>3</sub>) δ 4.97 (s, 1H), 3.72 (s, 3H), 3.36-3.32 (m, 2H), 3.21-3.15 (m, 2H), 1.54 (s, 3H), 1.09-1.05 (m, 6H).

<sup>13</sup>C NMR (100 MHz, CDCl<sub>3</sub>) δ 172.3, 169.5, 75.1, 52.8, 41.4, 41.0, 23.0, 13.3, 12.1.

HRMS: *m/z* (DART) calcd for C<sub>9</sub>H<sub>18</sub>NO<sub>4</sub> [M+H]<sup>+</sup>: 204.1235, found 204.1229.

IR (ATR): 3348, 2938, 1740, 1630, 1251, 1118, 980, 795 (cm<sup>-1</sup>).

R<sub>f</sub> = 0.50 (hexane:ethyl acetate = 1:1).

Yield: 72% (44.0 mg)

**Methyl 2-hydroxy-2-methyl-3-(4-morpholinyl)-3-oxopropanoate (2i)**

<sup>1</sup>H NMR (500 MHz, CDCl<sub>3</sub>) δ 4.60 (s, 1H), 3.81 (s, 3H), 3.75-3.45 (m, 8H), 1.63 (s, 3H).

<sup>13</sup>C NMR (125 MHz, CDCl<sub>3</sub>) δ 172.6, 168.7, 75.5, 66.6, 66.2, 53.1, 46.3, 43.7, 23.4.

HRMS: *m/z* (DART) calcd for C<sub>9</sub>H<sub>16</sub>NO<sub>5</sub> [M+H]<sup>+</sup>: 218.1028, found 218.1028.

IR (ATR): 3461, 3284, 2970, 1741, 1637, 1432, 1266, 1235, 1109, 1031, 969, 835 (cm<sup>-1</sup>).

R<sub>f</sub> = 0.50 (hexane:ethyl acetate = 1:2).

Yield: 68% (44.2 mg)

**Methyl 2-hydroxy-2-methyl-3-(1-indolinyl)-3-oxopropanoate (2j)**

<sup>1</sup>H NMR (500 MHz, CDCl<sub>3</sub>) δ 8.22 (d, *J* = 8.1 Hz, 1H), 7.25-7.19 (m, 2H), 7.09-7.06 (t, *J* = 7.5 Hz, 1H), 4.55 (s, 1H), 4.14 (dd, *J* = 10.9, 8.0, 1H), 3.97-3.92 (m, 1H), 3.81 (s, 3H), 3.12 (t, *J* = 8.0 Hz, 2H), 1.73 (s, 3H).

<sup>13</sup>C NMR (125 MHz, CDCl<sub>3</sub>) δ 172.6, 167.6, 143.1, 131.2, 127.5, 124.7, 124.5, 117.9, 53.3, 47.9, 28.6, 23.1.

HRMS: *m/z* (DART) calcd for C<sub>13</sub>H<sub>16</sub>NO<sub>4</sub> [M+H]<sup>+</sup>: 250.1079, found 250.1069.

IR (ATR): 3383, 3013, 1747, 1640, 1480, 1410, 1162, 1080, 750 (cm<sup>-1</sup>).

R<sub>f</sub> = 0.46 (hexane:ethyl acetate = 2:1).

Yield: 75% (65.0 mg)

**Methyl 3-*n*-butyl-2-hydroxy-3-oxopropanoate (3a)**

<sup>1</sup>H NMR (400 MHz, CDCl<sub>3</sub>) δ 4.80 (s, 1H), 3.83 (s, 1H), 2.77-2.56 (m, 2H), 1.66-1.56 (m, 2H), 1.38-1.25 (m, 2H), 0.91 (t, *J* = 2.4 Hz, 3H).

<sup>13</sup>C NMR (125 MHz, CDCl<sub>3</sub>) δ 204.4, 168.8, 77.6, 53.1, 38.3, 25.4, 22.1, 13.7.

HRMS: *m/z* (DART) calcd for C<sub>8</sub>H<sub>15</sub>O<sub>4</sub> [M+H]<sup>+</sup>: 175.0970, found 175.0972.

IR (ATR): 3441, 2960, 2875, 1727, 1439, 1210, 1170, 1123, 972 (cm<sup>-1</sup>)

R<sub>f</sub> = 0.40 (hexane:ethyl acetate = 3:1).

Yield: 4% (6.7 mg)

**6. References**

- (1) Rappoport, Z.; Gazit, A. *J. Org. Chem.* **1986**, *51*, 4112.
- (2) Hengzhen, Q.; Zhanhui, Y.; Jiaxi, X. *Synthesis* **2011**, *5*, 723.
- (3) Kanai, N.; Nakayama, H.; Tada, N.; Itoh, A. *Org. Lett.* **2010**, *12*, 1948.
- (4) Ciufolini, M.; Rohrschange, F. WO1998004557 A1 19980205.
- (5) Chuang, G.-J.; Wang, W.; Lee, E.; Ritter, T. *J. Am. Chem. Soc.* **2011**, *133*, 1760.

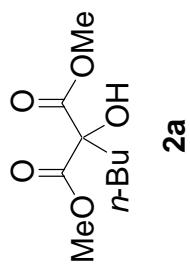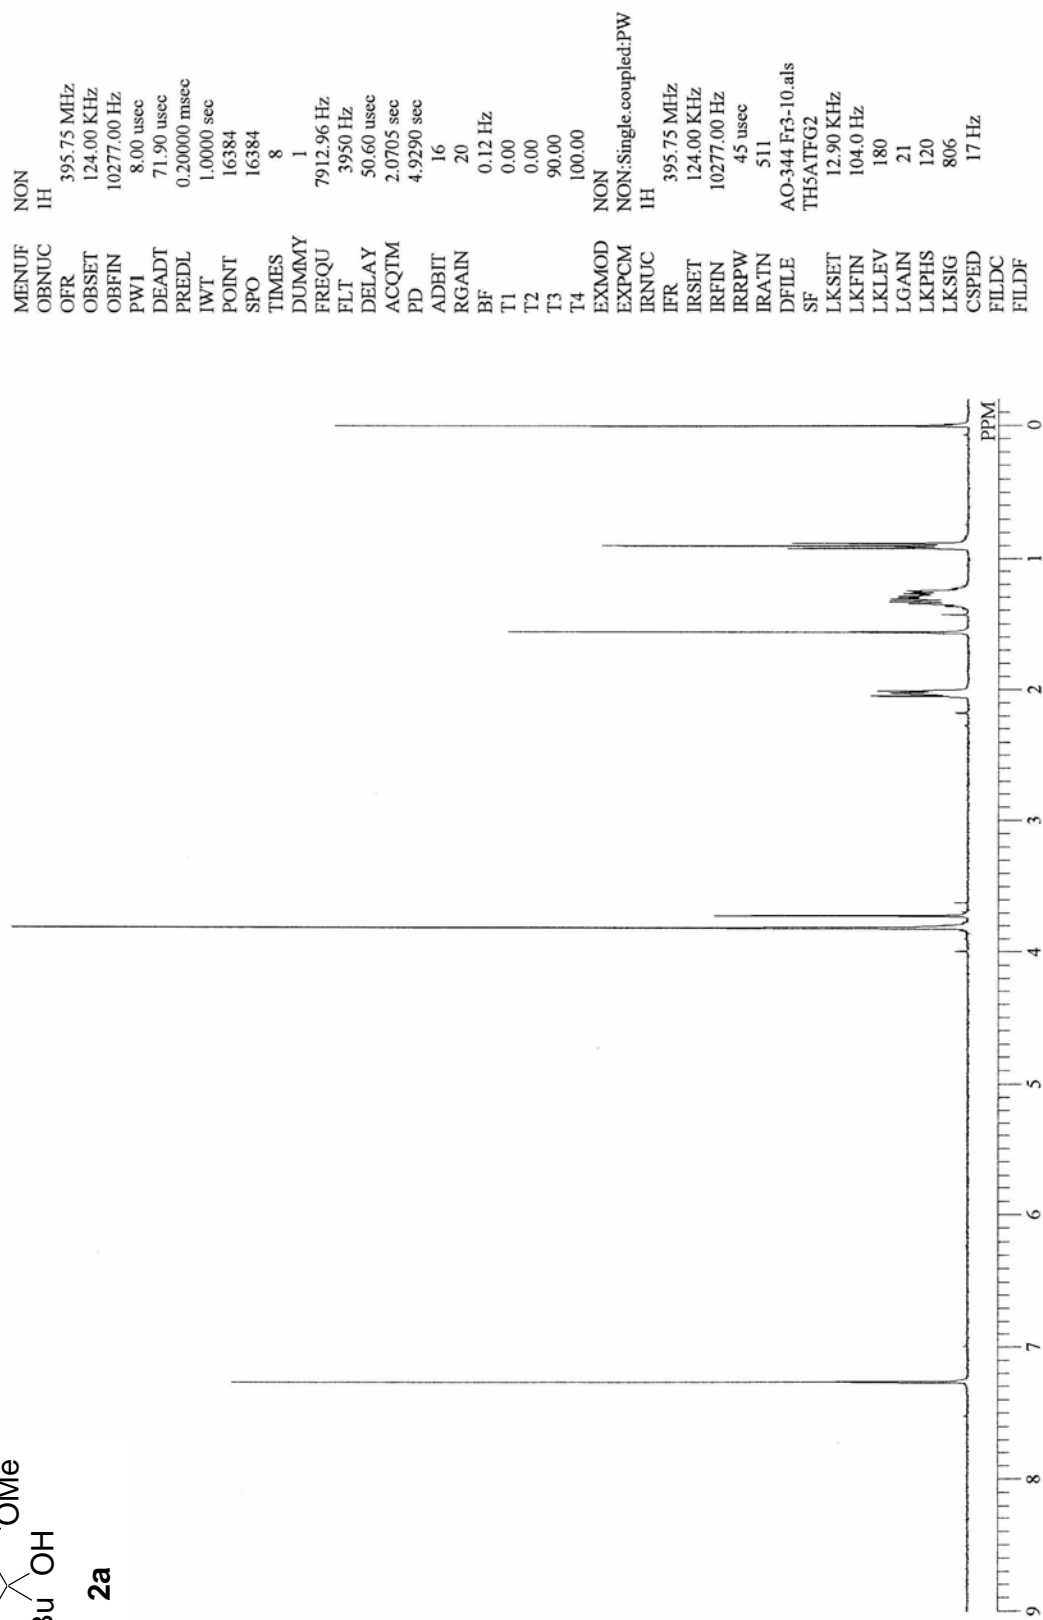

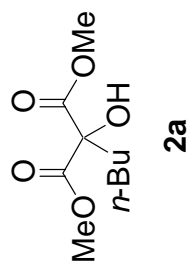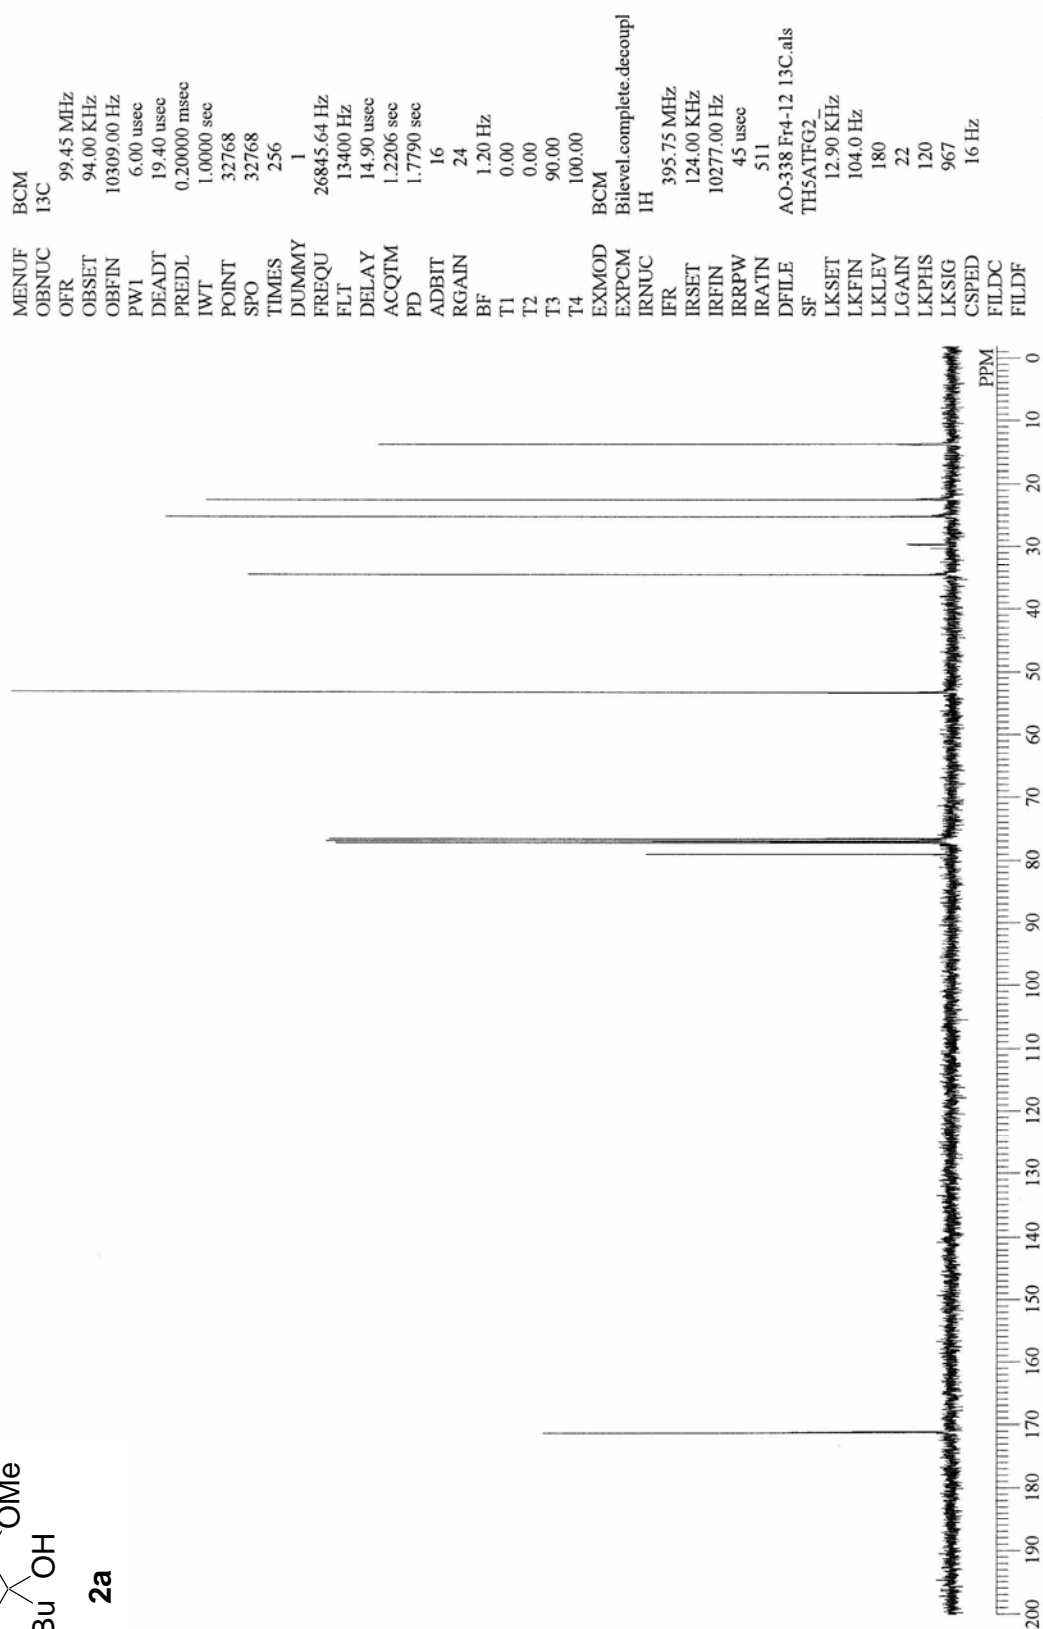



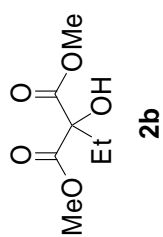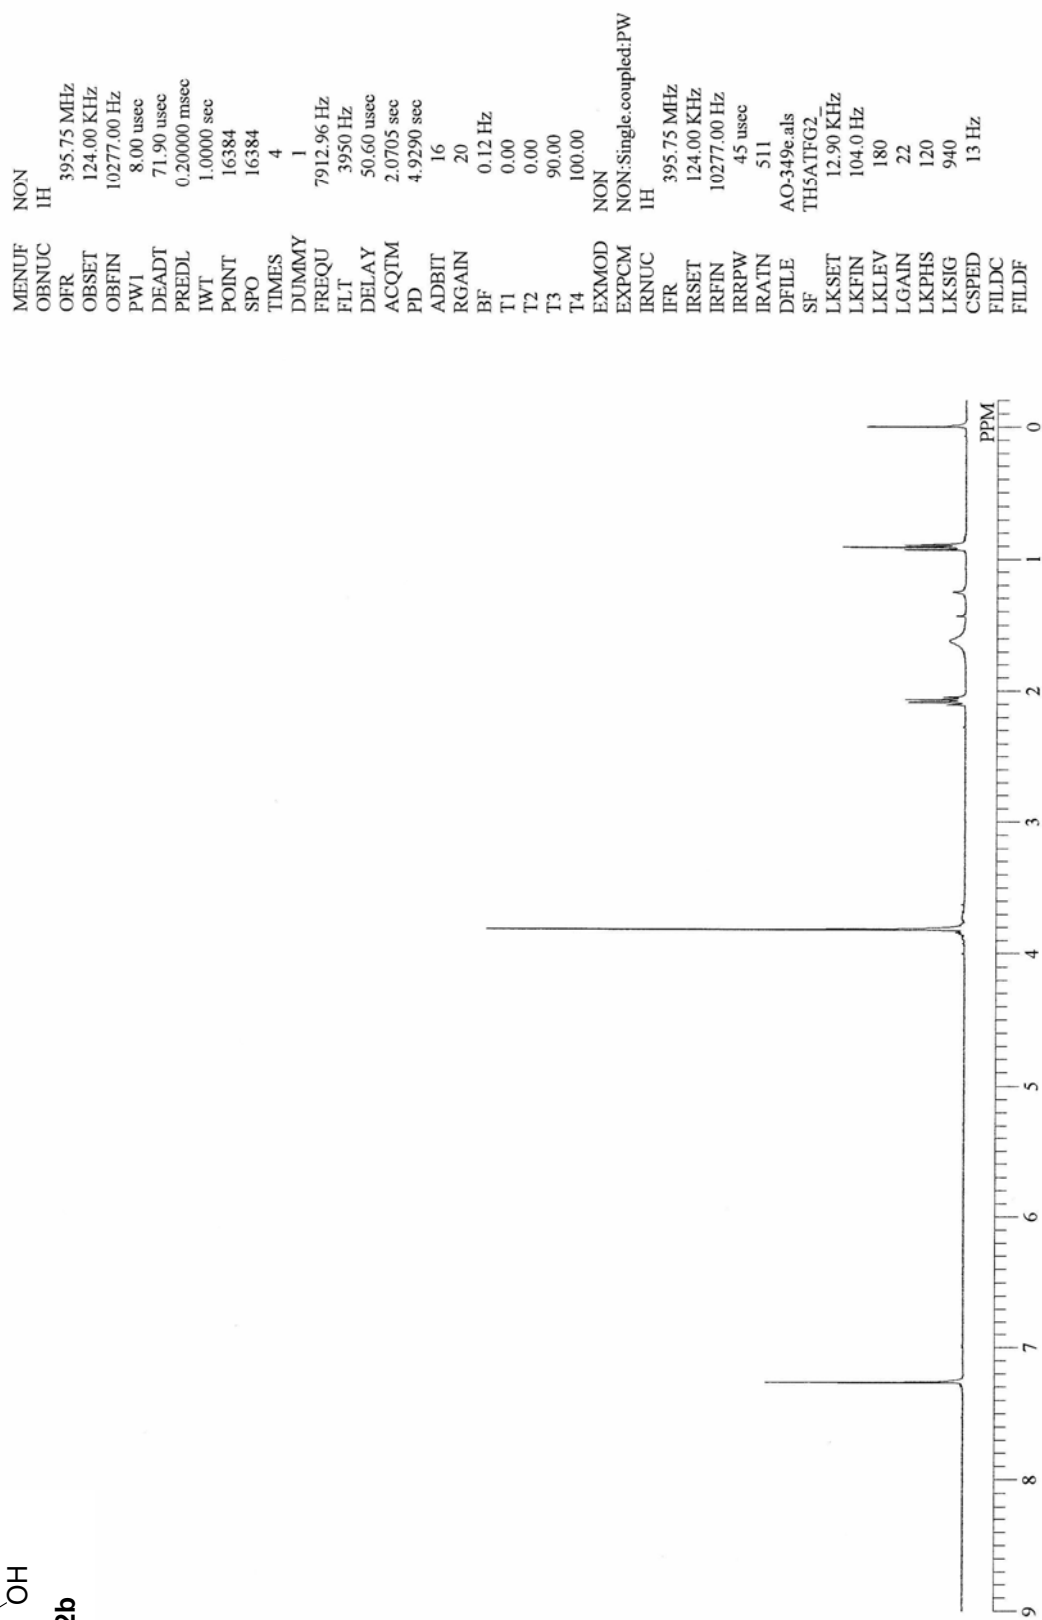

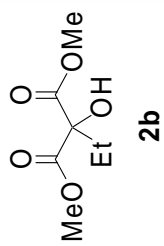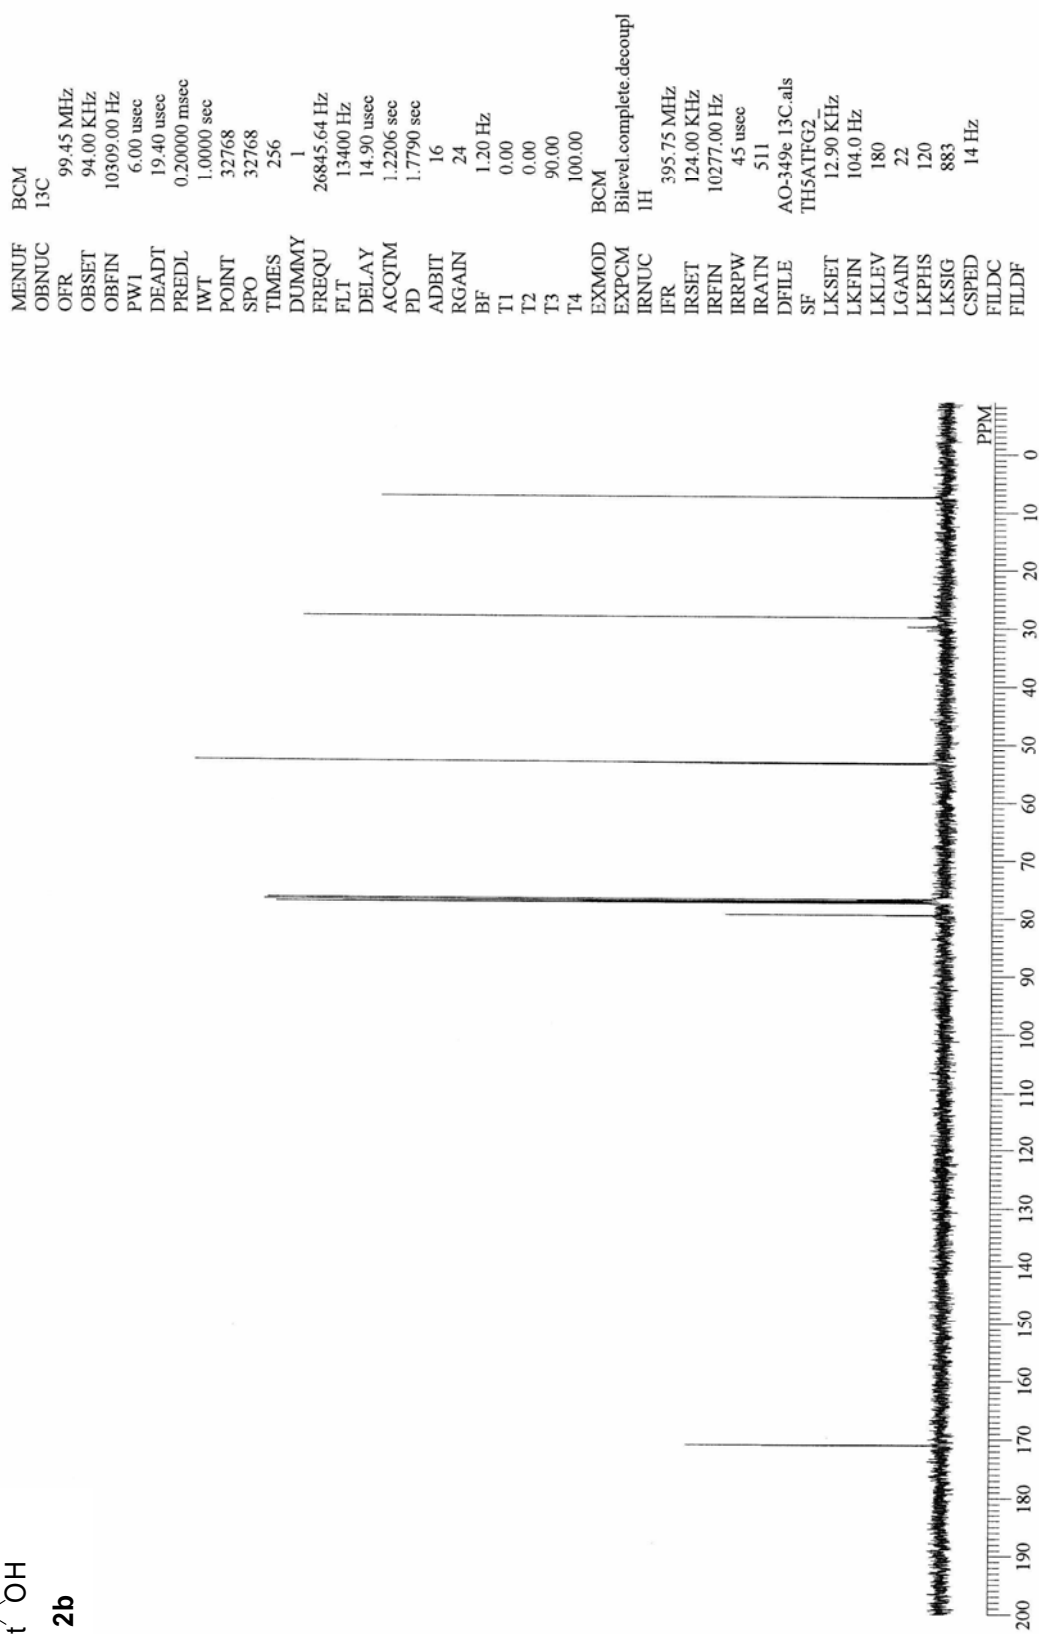

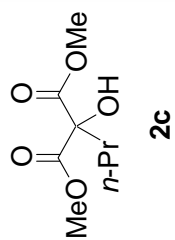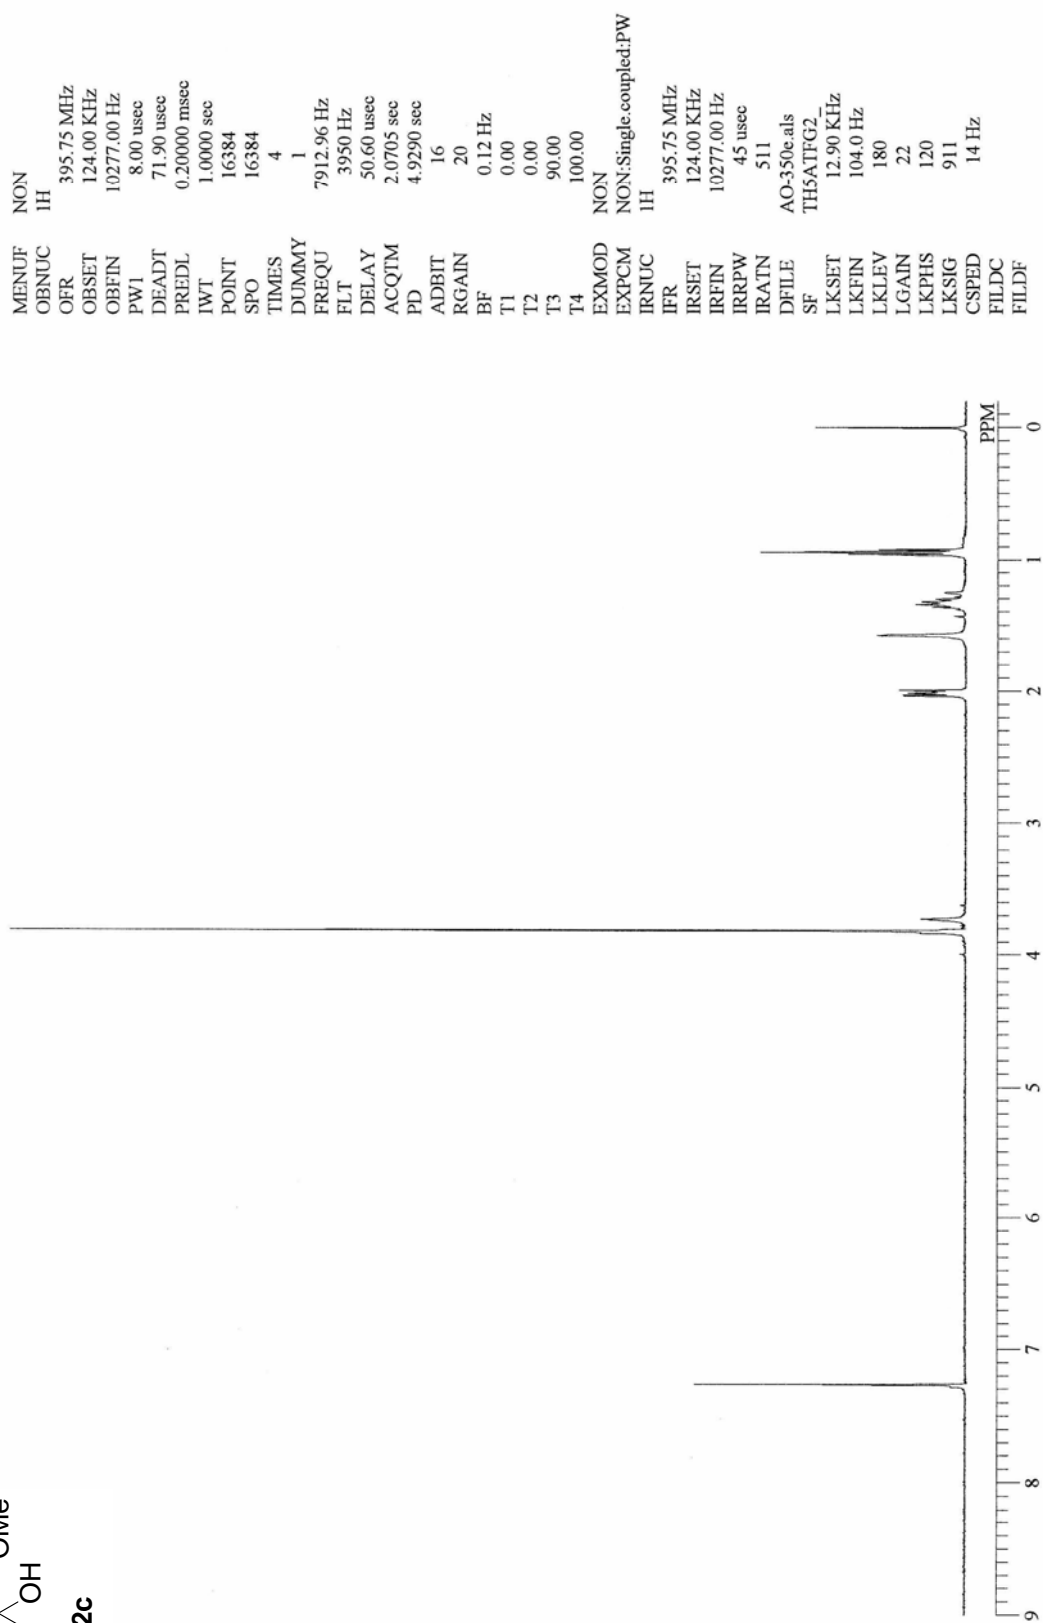

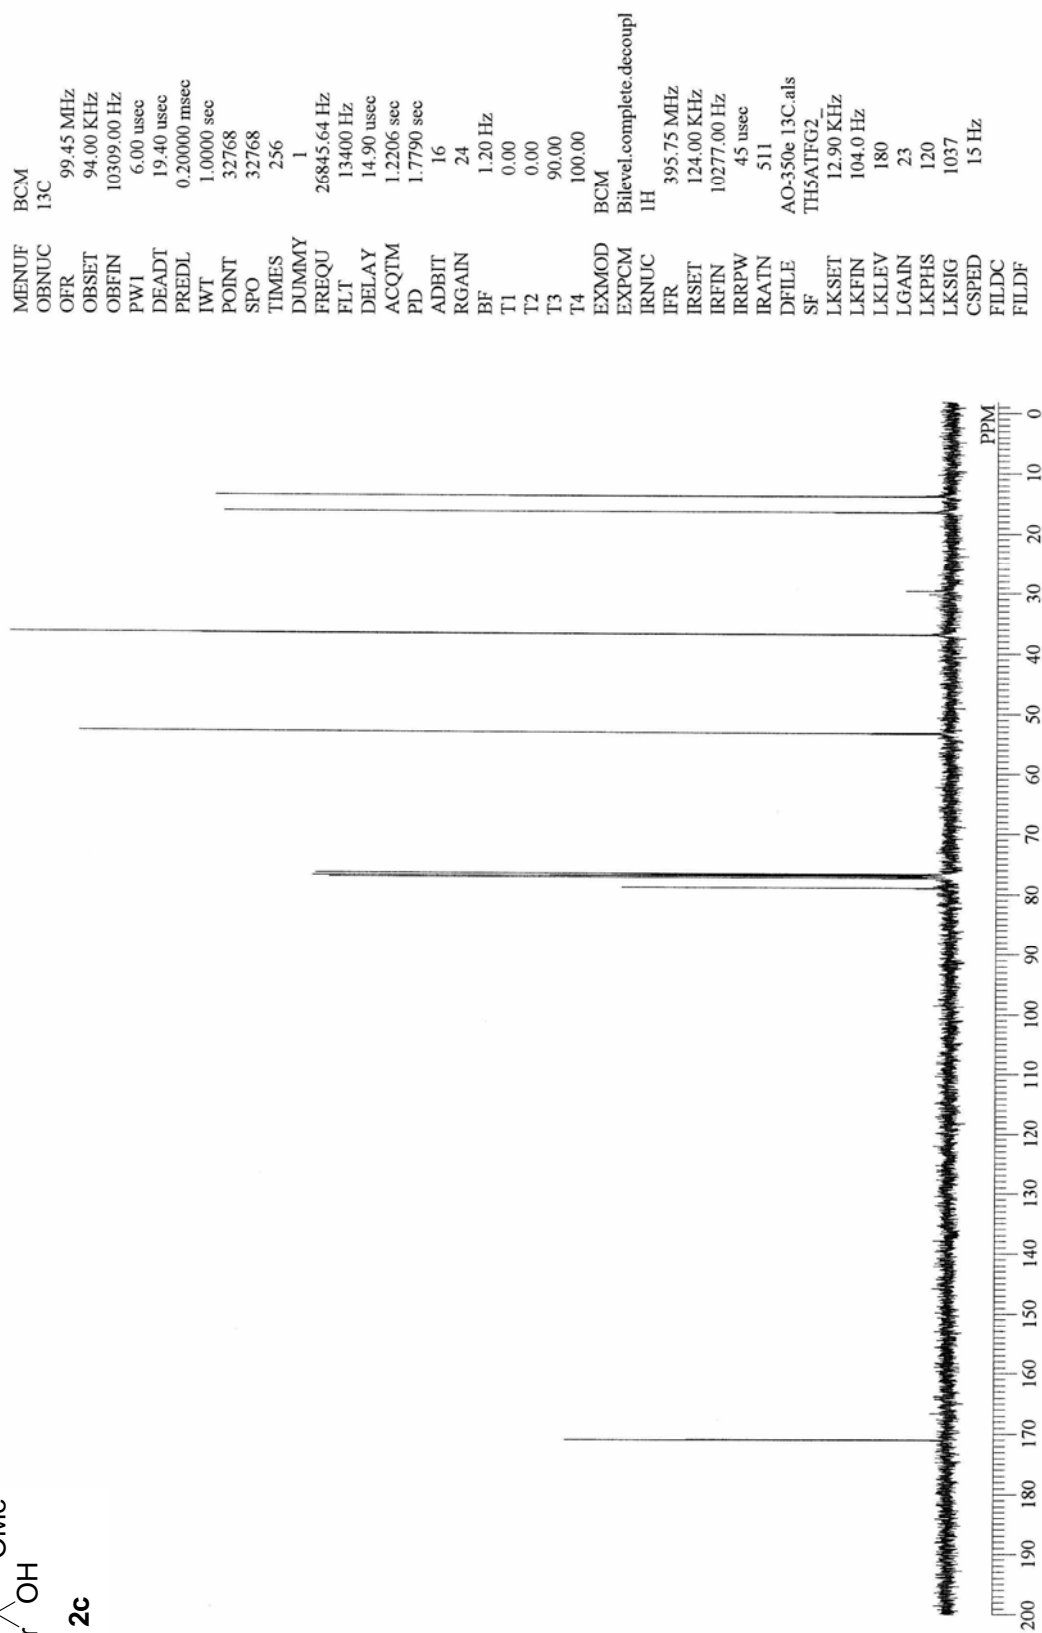

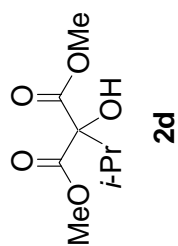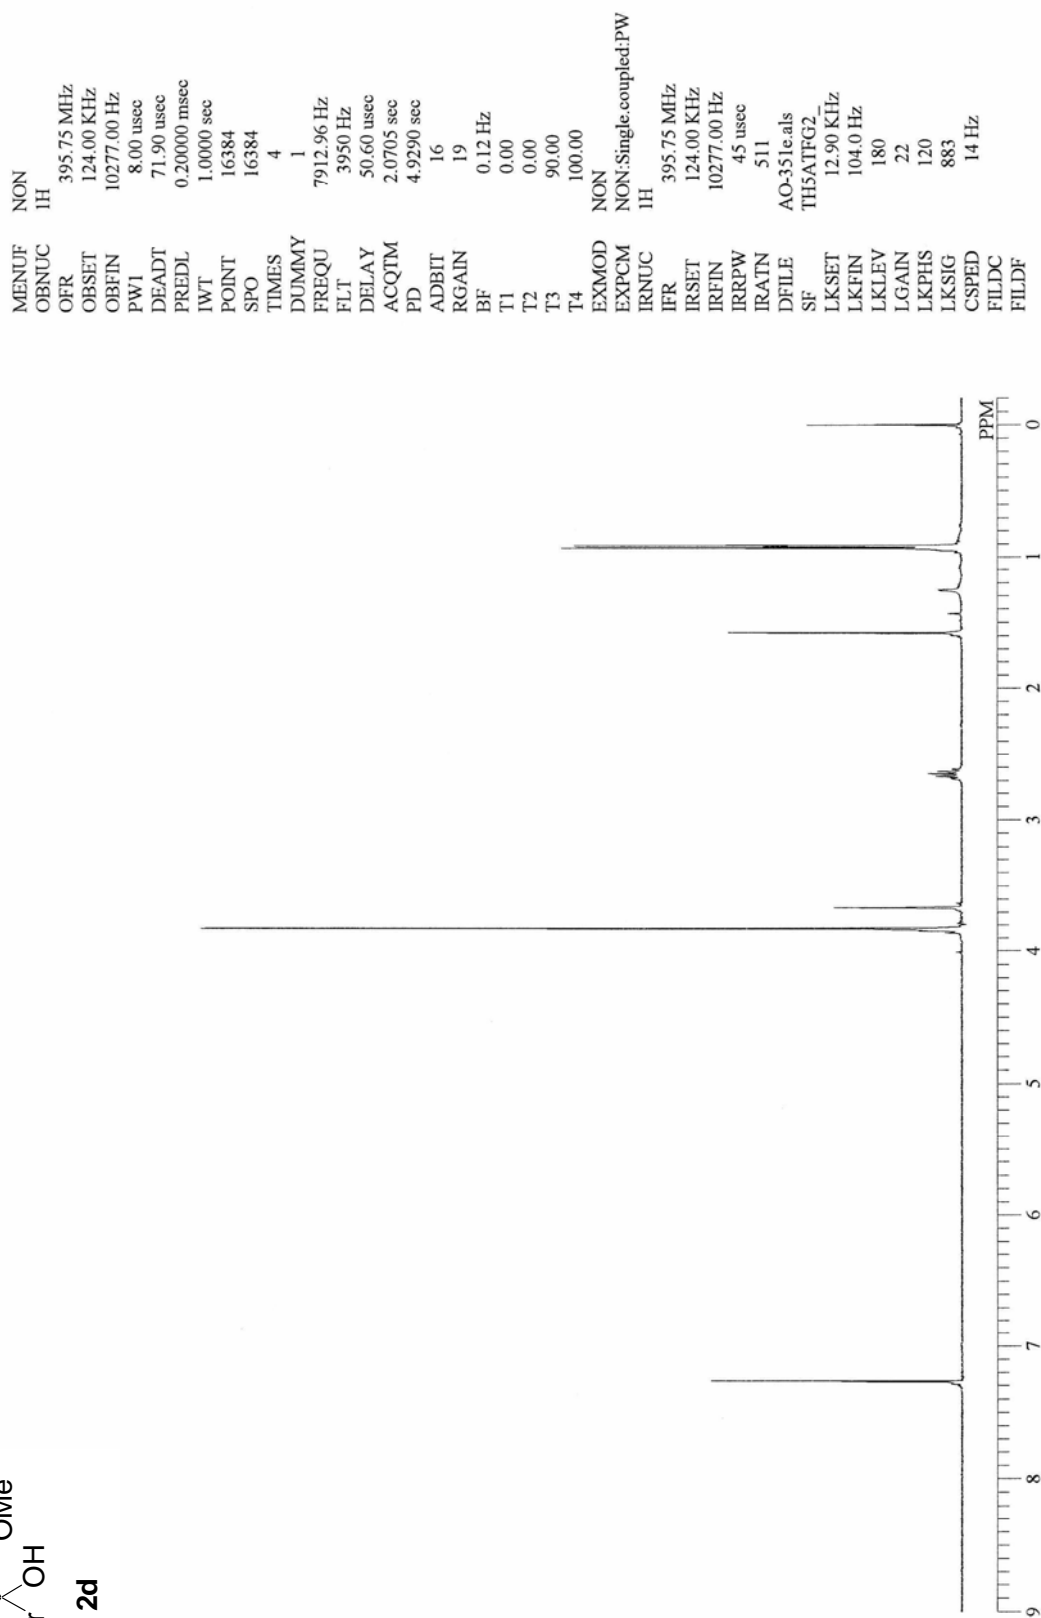

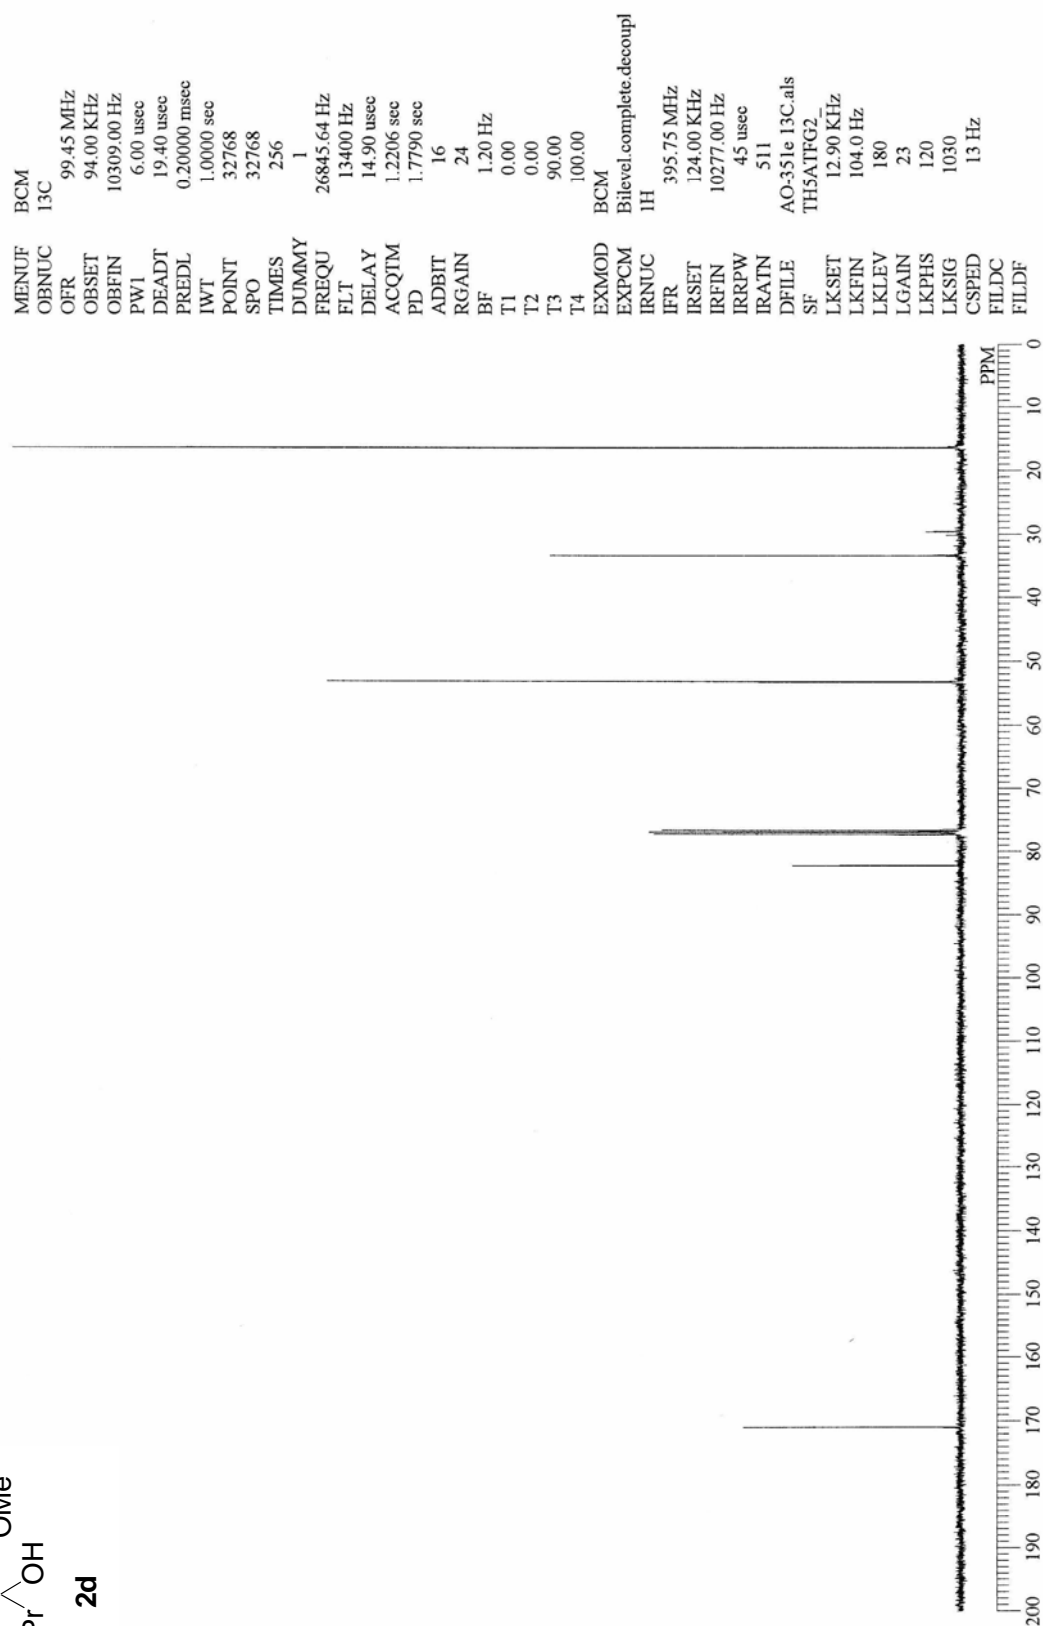

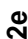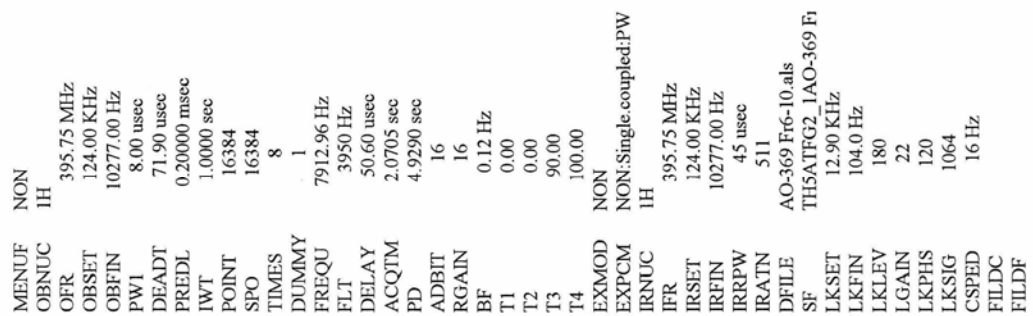

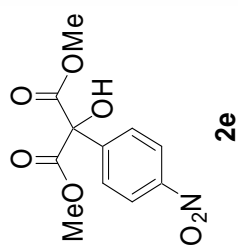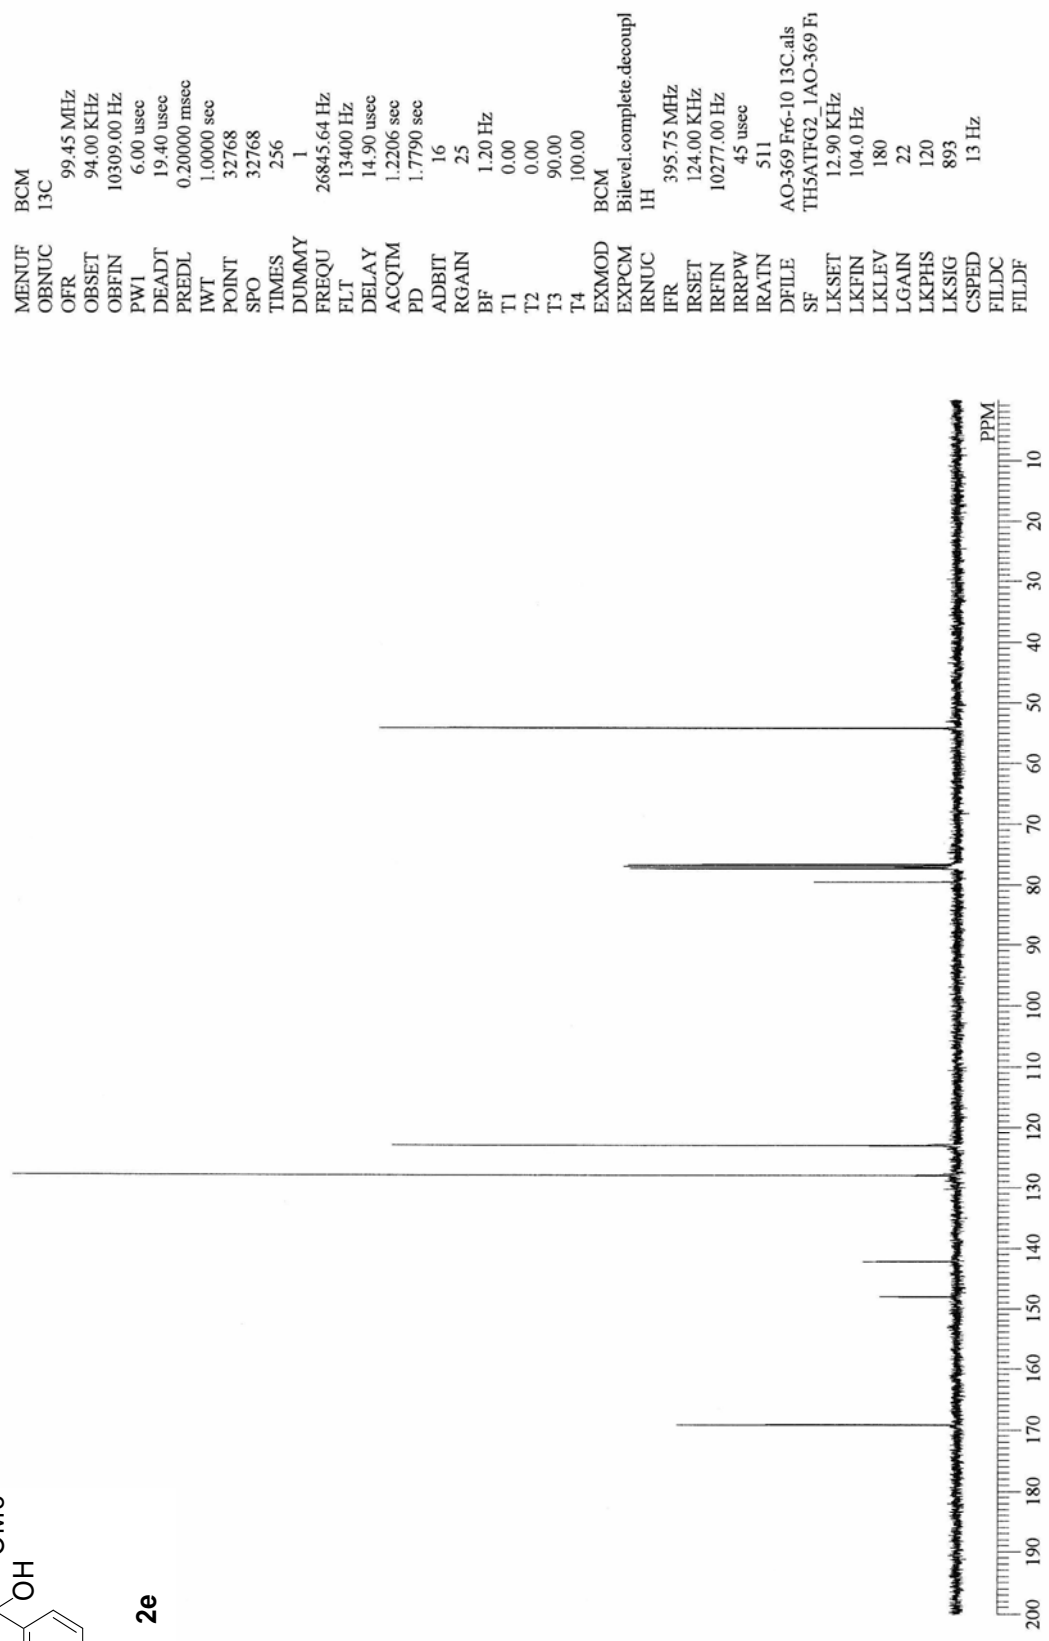



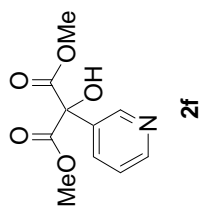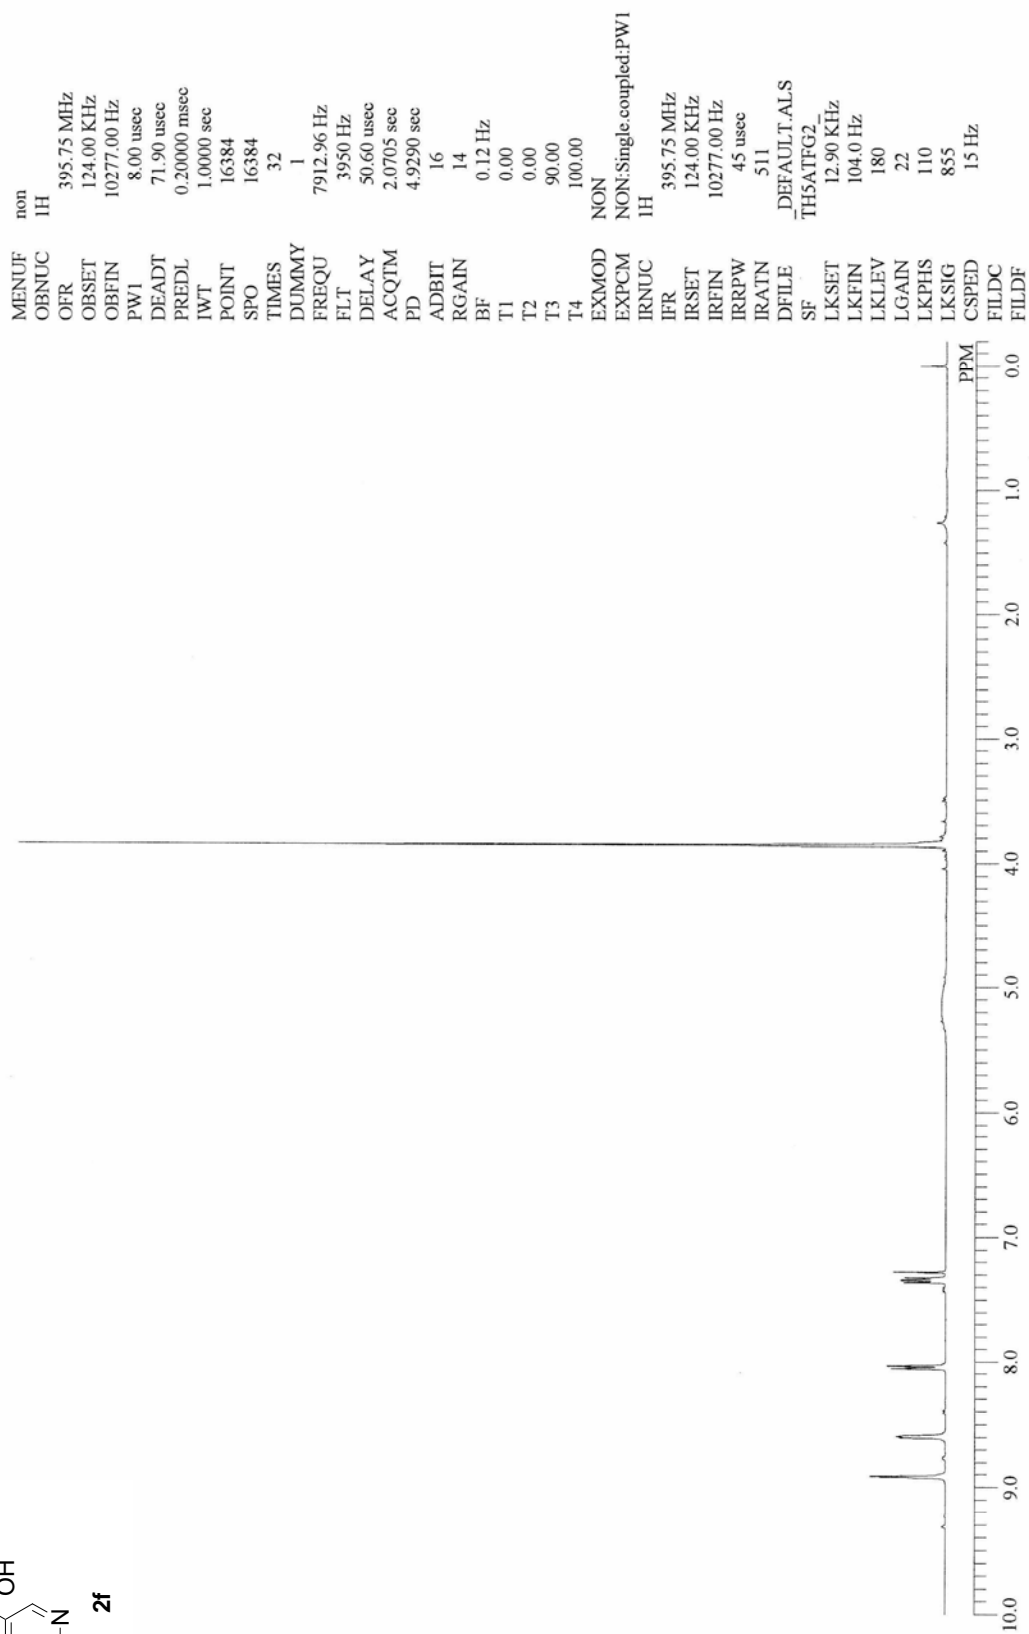

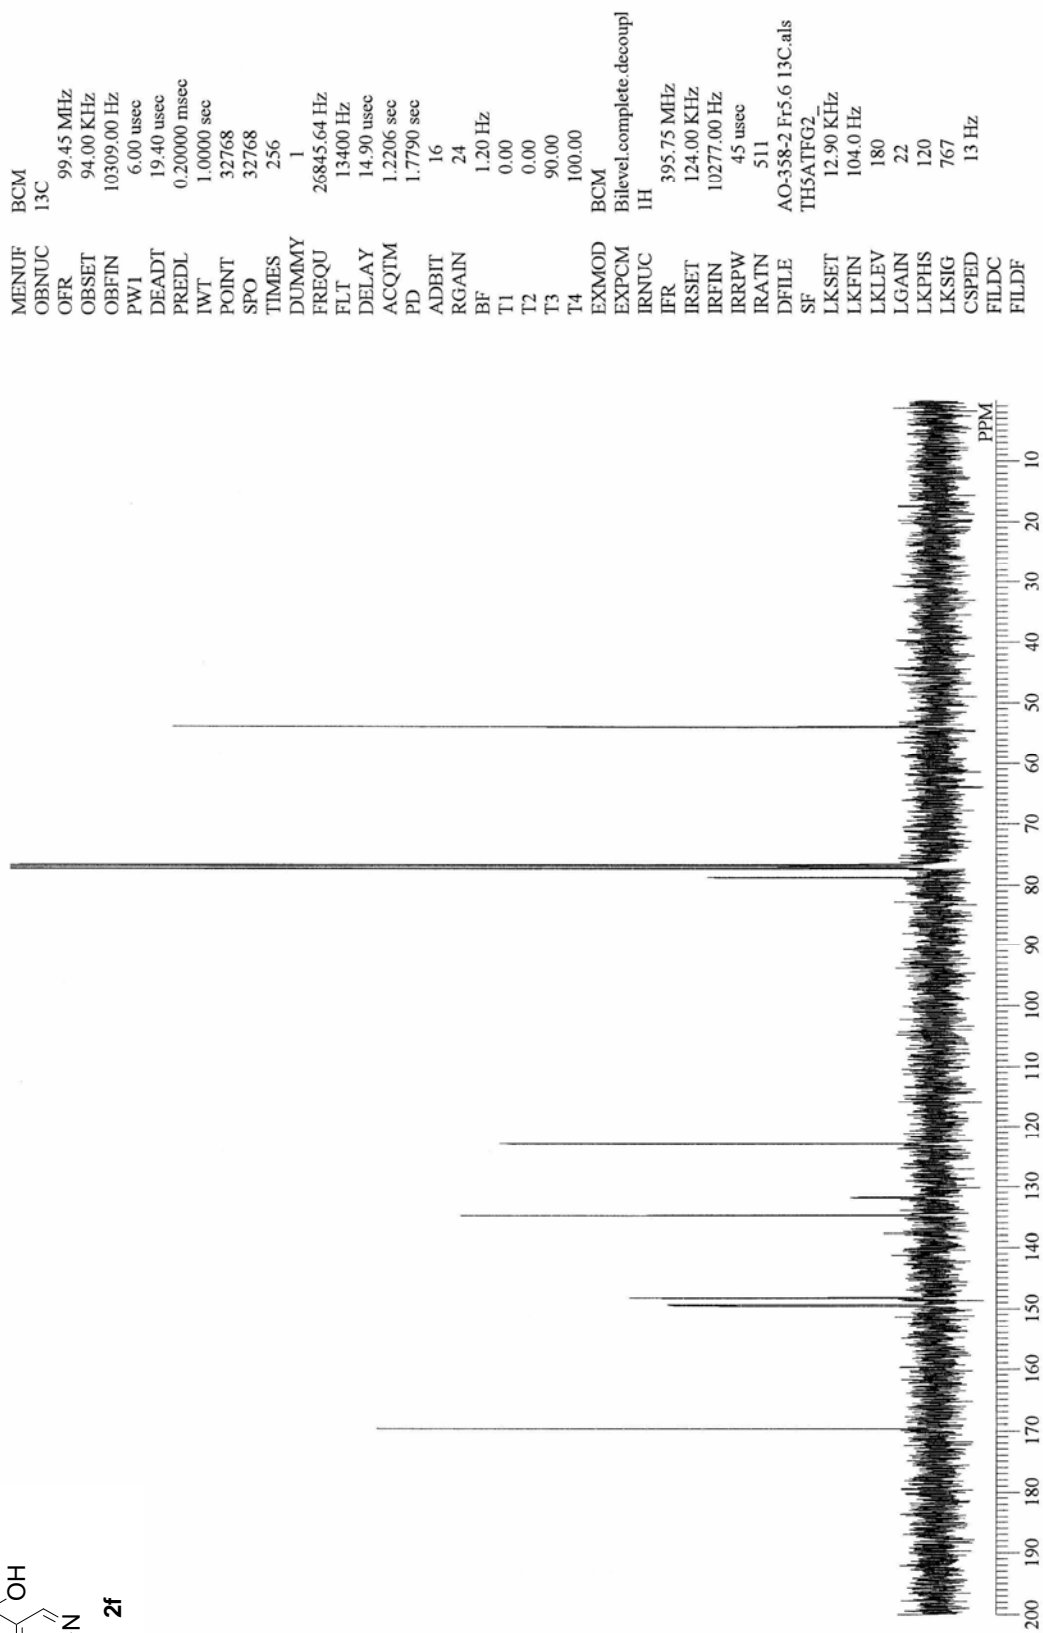

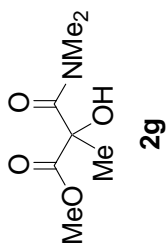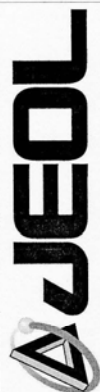

```

Filename      = AO-409 Frl1-17-3.jdf
Author        = delta
Experiment    = 8474101
Sample       = CHLOROFORM-D
Solvent       = CHLOROFORM-D
Creation time = 10-JUN-2015 13:05:51
Revision time = 2-JUL-2015 20:54:45
Current time  = 2-JUL-2015 20:55:02

Comment      = AO-409 Frl1-17
Data format  = ID COMPLEX
Dim size     = 1x107
Dim time     = 1H
Dim units    = [ppm]
Dimensions   = X
Site         = ECA 500
Spectrometer = JNM-ECA500

Field strength = 11.7473575 [T] (500 [MH]
X_acq_duration = 1.74587904 [s]
X_domain       = 500.15991521 [MHz]
X_offset       = 5.0 [ppm]
X_points       = 16384
X_prescans     = 1
X_resolution   = 0.57277737 [Hz]
X_sweep        = 9.38438438 [kHz]
Irr_domain     = 1H
Irr_freq       = 500.15991521 [MHz]
Irr_offset     = 5.0 [ppm]
Irr_domain     = 1H
Tri_domain     = 500.15991521 [MHz]
Tri_freq       = 500.15991521 [MHz]
Tri_offset     = 5.0 [ppm]
Clipped        = FALSE
Mod_return     = 1
Scans          = 8
Total_scans    = 8

X_90_width     = 11 [us]
X_acq_time     = 1.74587904 [s]
X_angle        = 45 [deg]
X_atn          = 3 [dB]
X_pulse        = 5.5 [us]
Irr_mode       = Off
Tri_mode       = Off
Dante_presat   = FALSE
Initial_wait   = 1 [s]
Recvr_gain     = 50
Recvr_gain_delay = 5 [s]
Repetition_time = 6.74587904 [s]
Temp_get       = 21.5 [dC]
  
```

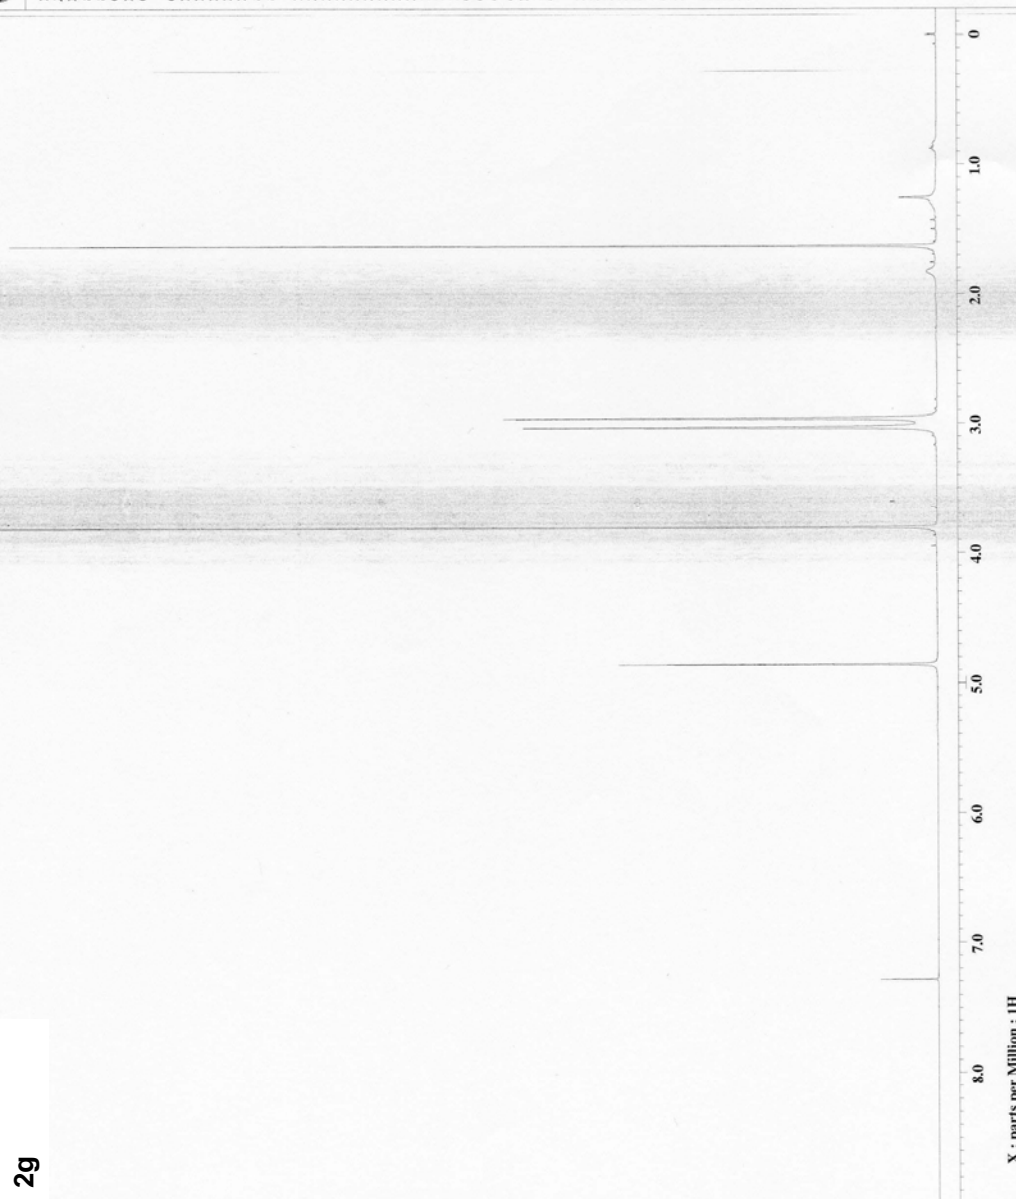

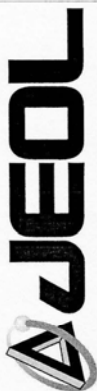

Filename = AO-409 fr11-17 13C-3.  
Author = delta  
Experiment = SH475589  
Sample\_id = CHLOROPORM-D  
Solvent = CHLOROPORM-D  
Creation\_time = 10-JUN-2015 13:13:25  
Revision\_time = 2-JUL-2015 21:02:00  
Current\_time = 2-JUL-2015 21:02:04  
Comment = AO-409 fr11-17 13C  
Data\_format = 3D COMPLEX  
Dim size = 26214  
Dim title = 13C  
Dim units = [ppm]  
Dimensions = X  
Site = ECA 500  
Spectrometer = JNM-ECA500  
Field\_strength = 11.7473579 [T] (500 [MH  
X\_acq\_duration = 0.83361792 [s]  
X\_domain = 128  
X\_offset = 125.76529768 [MHz]  
X\_offset = 100 [ppm]  
X\_points = 32768  
X\_prescans = 4  
X\_resolution = 1.19959034 [Hz]  
X\_sweep = 39.3081761 [kHz]  
Irr\_domain = 1H  
Irr\_freq = 500.15991521 [MHz]  
Irr\_offset = 0 [ppm]  
C11\_offset = FALSE  
Mod\_return = 1  
Scans = 128  
Total\_scans = 128  
X\_90\_width = 10 [us]  
X\_acq\_time = 0.83361792 [s]  
X\_angle = 30 [deg]  
X\_atn = 3.13333333 [us]  
X\_atn\_dec = 3.13333333 [us]  
Irr\_atn\_dec = 21.4479 [dB]  
Irr\_atn\_noe = 21.4479 [dB]  
Irr\_noise = WALTZ  
Decoupling = TRUE  
Initial\_wait = 1 [s]  
Noe = TRUE  
Noe\_time = 2 [s]  
Relaxation\_delay = 2 [s]  
Repetition\_time = 2.83361792 [s]  
Temp\_get = 21.7 [dC]

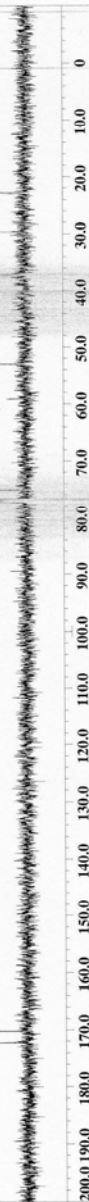

X : parts per Million : 13C

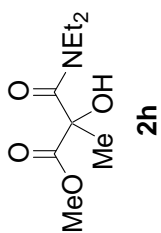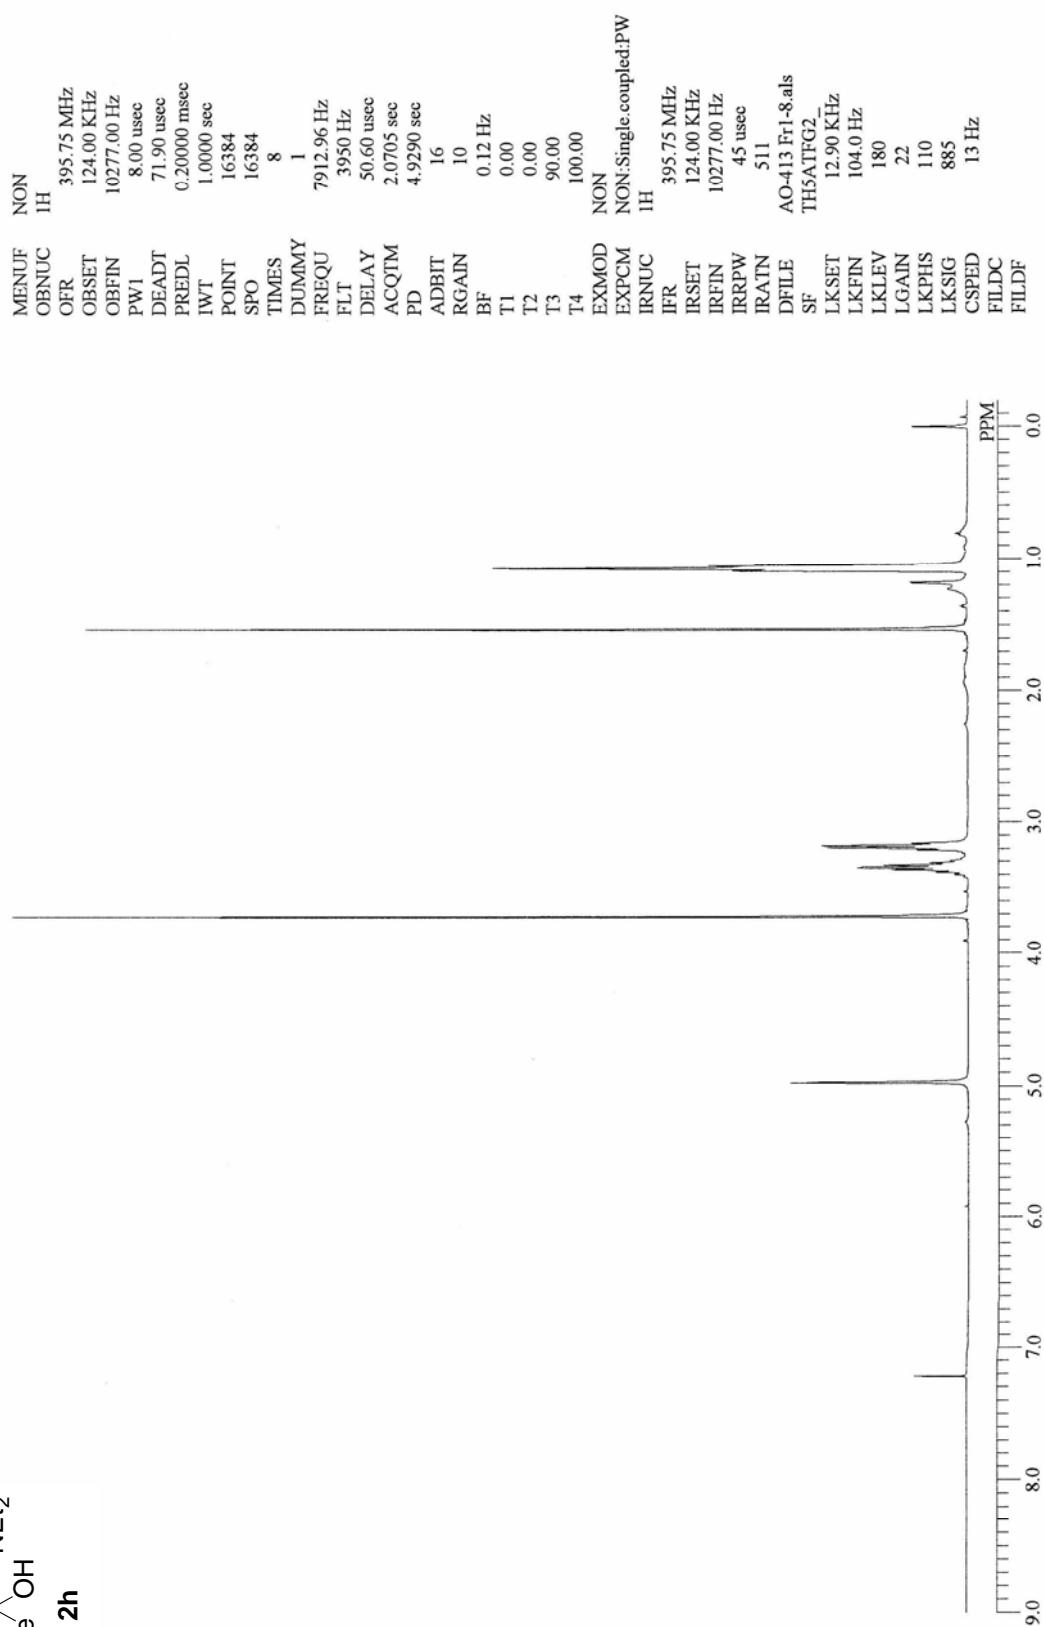

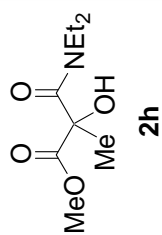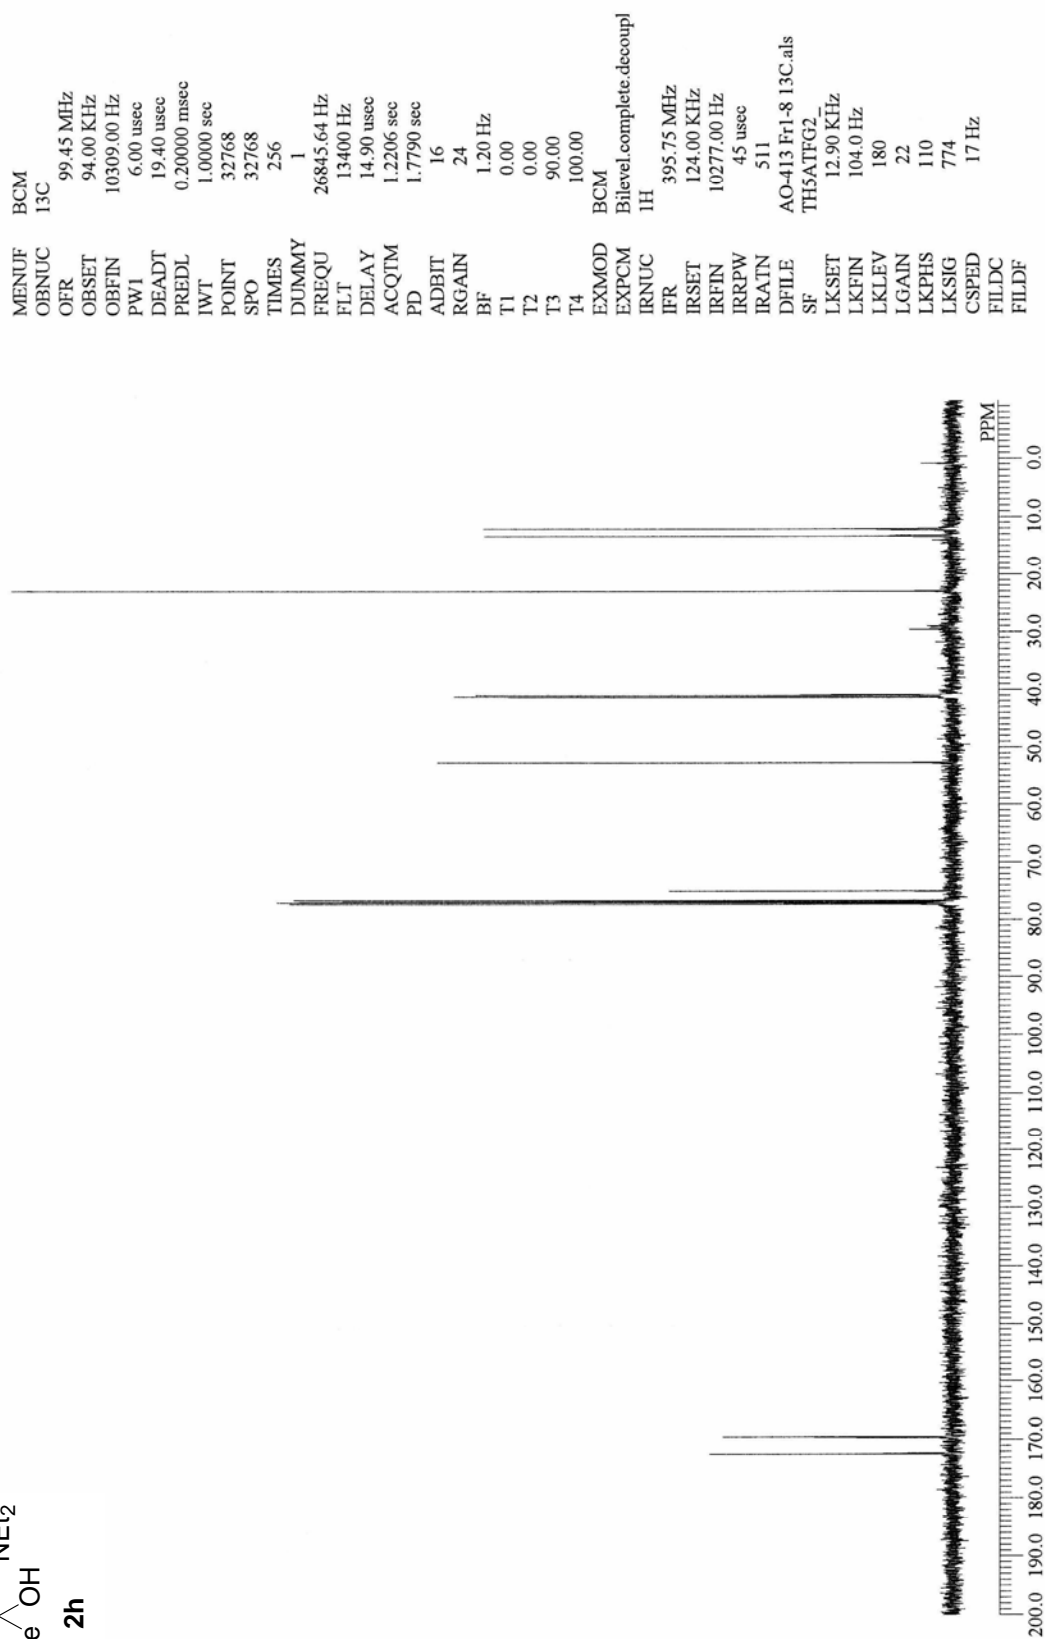

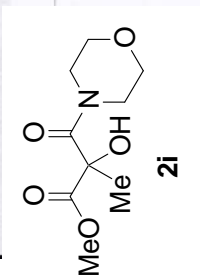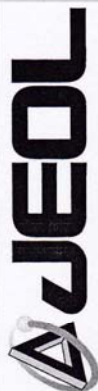

Filename = AO-416 FF7-10-3.jdf  
 Author = delta  
 Experiment = singl\_pulse.ex2  
 Sample\_id = S170505  
 Solvent = CHLOROFORM-D  
 Creation time = 17-JUN-2015 20:49:23  
 Revision time = 2-JUL-2015 21:06:26  
 Current time = 2-JUL-2015 21:06:47  
 Comment = AO-416 FF7-10  
 Data\_format = 1D COMPLEX  
 Data\_size = 13107  
 Data\_title =  
 Data\_units = [ppm]  
 Dimensions = X  
 Site = ECA 500  
 Spectrometer = JNM-ECA500  
 Field\_strength = 11.7473579 [T] (500 [MH  
 X\_acq\_duration = 1.74587904 [s]  
 X\_domain = 1H  
 X\_freq = 500.15891521 [MHz]  
 X\_offset = 5.0 [ppm]  
 X\_points = 16384  
 X\_prescans = 1  
 X\_resolution = 0.57277737 [Hz]  
 X\_sweep = 9.38438438 [kHz]  
 Irr\_domain = 1H  
 Irr\_freq = 500.15891521 [MHz]  
 Irr\_offset = 5.0 [ppm]  
 Tri\_domain = 1H  
 Tri\_offset = 500.15891521 [MHz]  
 Clipped = FALSE  
 Mod\_return = 1  
 Scans = 8  
 Total\_scans = 8  
 X\_90\_width = 11 [us]  
 X\_acq\_time = 1.74587904 [s]  
 X\_sweep = 45 [deg]  
 X\_atq = 3 [dB]  
 X\_pulse = 5.5 [us]  
 Irr\_mode = Off  
 Tri\_mode = Off  
 Dante\_presat = FALSE  
 Initial\_wait = 1 [s]  
 Recvz\_gain = 30  
 Relaxation\_delay = 2 [s]  
 Repetition\_time = 3.74587904 [s]  
 Temp\_get = 21.5 [dc]

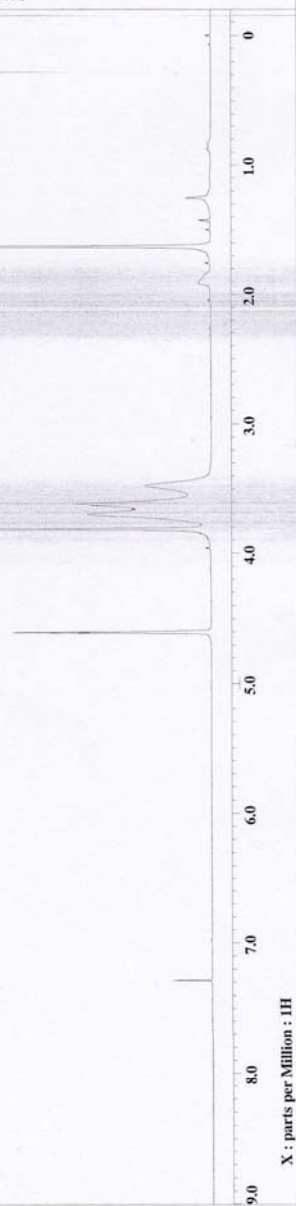

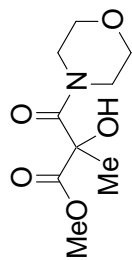

2i

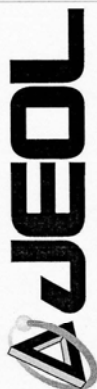

```

Filename = AO-416 Fr7-10 13C-3.j
Author = delta
Experiment = smt_pulse_dec
Sample_id = SH95161
Solvent = CHLOROFORM-D
Creation_time = 17-JUN-2015 20:53:56
Revision_time = 2-JUL-2015 21:07:57
Current_time = 2-JUL-2015 21:08:18

Comment = AO-416 Fr7-10 13C
Data_format = 1D COMPLEX
Dim_size = 26214
Data_title = 13C
Dim_units = [ppm]
Dimensions = X
Site = ECA 500
Spectrometer = JNM-ECA500

Field_strength = 11.7473579[T] (500[MH]
X_acq_duration = 0.83361792[s]
X_domain = 13C
X_freq = 125.76529768[MHz]
X_offset = 100[ppm]
X_points = 32768
X_prescans = 4
X_resolution = 1.19959034[Hz]
X_sweep = 39.3081761[MHz]
Irr_domain = 1H
Irr_freq = 500.15891521[MHz]
Irr_offset = 50[ppm]
Clipped = FALSE
Mod_return = 1
Scans = 128
Total_scans = 128

X_90_width = 10[us]
X_acq_time = 0.83361792[s]
X_angle = 30[deg]
X_gain = 5[dB]
X_pulse = 3.33333333[us]
X_atn_dec = 21.4479[dB]
Irr_atn_dec = 21.4479[dB]
Irr_atn_noe = TRUE
Decoupling = WALTZ
Initial_wait = 1[s]
Noe_time = TRUE
Noe_delay = 1[s]
Relaxation_delay = 5[s]
Repetition_time = 1.83361792[s]
Temp_get = 21.8[DC]
  
```

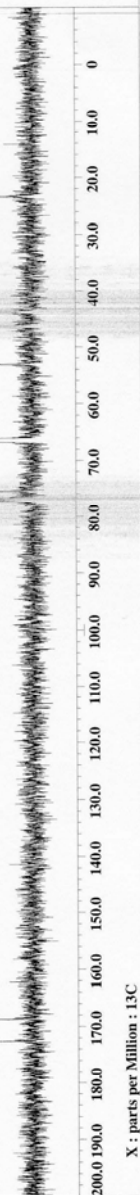



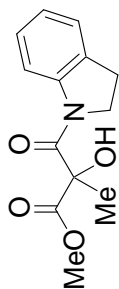

2j

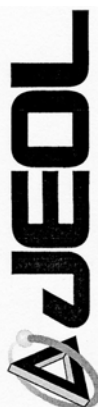

```

Filename      = AO-414 Fr5-8-3.jdf
Author        = delta
Experiment    = single_pulse.ex2
Sample_id     = #751647
Solvent       = CHLOROFORM-D
Creation_time = 16-JUN-2015 20:48:04
Revision_time = 2-JUL-2015 21:10:25
Current_time  = 2-JUL-2015 21:10:39

Comment       = AO-414 Fr5-8
Data_format   = ID COMPLEX
Dim_size      = 13107
Dim_time      = 1H
Dim_units     = [ppm]
Dimensions    = X
Site          = ECA 500
Spectrometer  = JNM-ECA500

Field_strength = 11.7473579[T] (500[MH]
X_acq_duration = 1.74587904[s]
X_domain       = 1H
X_freq         = 500.15991521[MHz]
X_offset       = 5.0[ppm]
X_points       = 16384
X_prescans     = 1
X_resolution   = 0.57277737[Hz]
X_sweep        = 9.38438438[KHz]
X_domain       = 1H
Irr_freq       = 500.15991521[MHz]
Irr_offset     = 5.0[ppm]
Tri_domain     = 1H
Tri_freq       = 500.15991521[MHz]
Tri_offset     = 5.0[ppm]
Clipped        = FALSE
Mod_return     = 1
Scans          = 8
Total_scans    = 8
X_90_width     = 11[us]
X_acq_time     = 1.74587904[s]
X_angle        = 45[deg]
X_atn          = 3[dB]
X_pulse        = 5.5[us]
Irr_mode       = Off
Tri_mode       = Off
Dante_presat   = FALSE
Initial_wait   = 1[s]
Recvr_gain     = 28
Relaxation_delay = 2[s]
Repetition_time = 3.74587904[s]
Temp_get       = 21.5[deg]
  
```

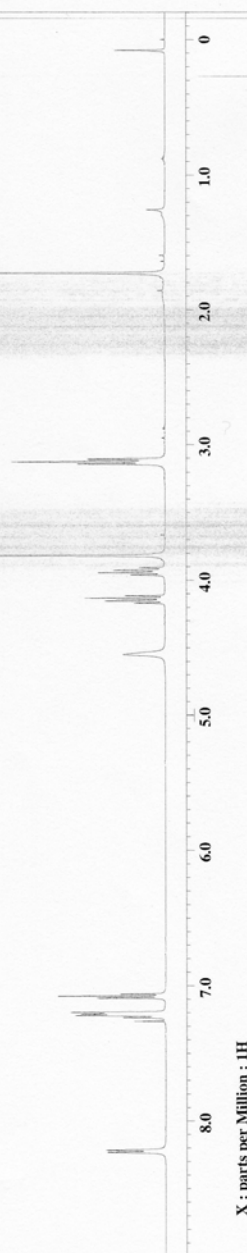

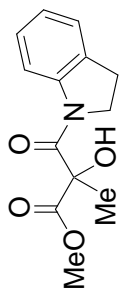

2j

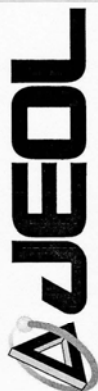

```

----- PROCESSING PARAMETERS -----
dc balance : 0 : FALSE
gamma : 0 : 0.0000000000000000
trapezoid3 : 0 [%] : 80 [%] : 100 [%]
zerofill : 1
fft : 1 : TRUE : TRUE
machinephase
ppm
Derived from: AO-414 fr5-8 13C-1.jdf
  
```

```

Filename = AO-414 fr5-8 13C-3.jd
Author = delta
Experiment = shigao_pulse_dec
Sample_id = 84752978
Solvent = CHLOROFORM-D
Creation time = 16-JUN-2015 20:53:36
Revision time = 2-JUL-2015 21:11:20
Current time = 2-JUL-2015 21:11:40
Comment = AO-414 Fr5-8 13C
Data_format = 2D COMPLEX
Dim_size = 13214
Dim_units = [ppm]
Dimensions = X
Site = ECA 500
Spectrometer = JNM-ECA500
Field_strength = 11.7473579 [T] (500 [MH]
X_acq_duration = 0.83361792 [s]
X_domain = 12C
X_freq = 125.76529768 [MHz]
X_offset = 100 [ppm]
X_points = 32768
X_prescans = 4
X_resolution = 1.19959034 [Hz]
X_sweep = 39.3081761 [kHz]
Irr_domain = 1H
Irr_freq = 500.15991521 [MHz]
Irr_offset = 5.0 [ppm]
C13ppmdec = PAUSE
Modetern = 1
Scans = 128
Total_scans = 128
X_90_width = 10 [us]
X_acq_time = 0.83361792 [s]
X_angle = 30 [deg]
X_tau = 3.33333333 [us]
X_atn = 3.33333333 [us]
Irr_atn_dec = 21.4479 [dB]
Irr_atn_noe = 21.4479 [dB]
Irr_noise = WALTZ
Decoupling = TRUE
Initial_wait = 1 [s]
Noe = TRUE
Nocv_time = 4 [s]
Nocv_gain_delay = 1 [s]
Repetition_time = 1.83361792 [s]
Temp_get = 21.8 [dC]
  
```

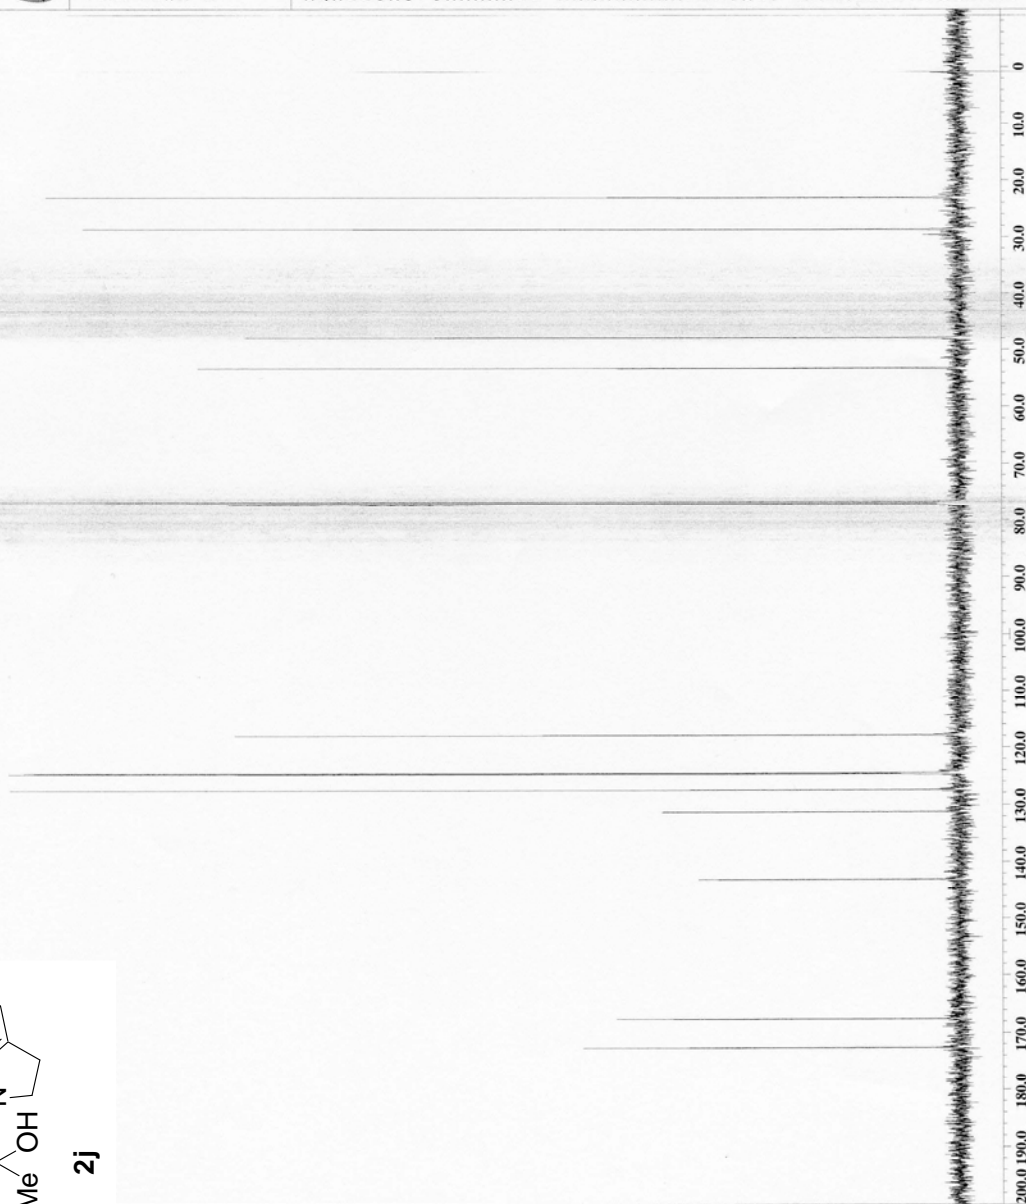

X : parts per Million : 13C

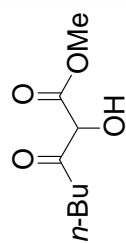

**3a**

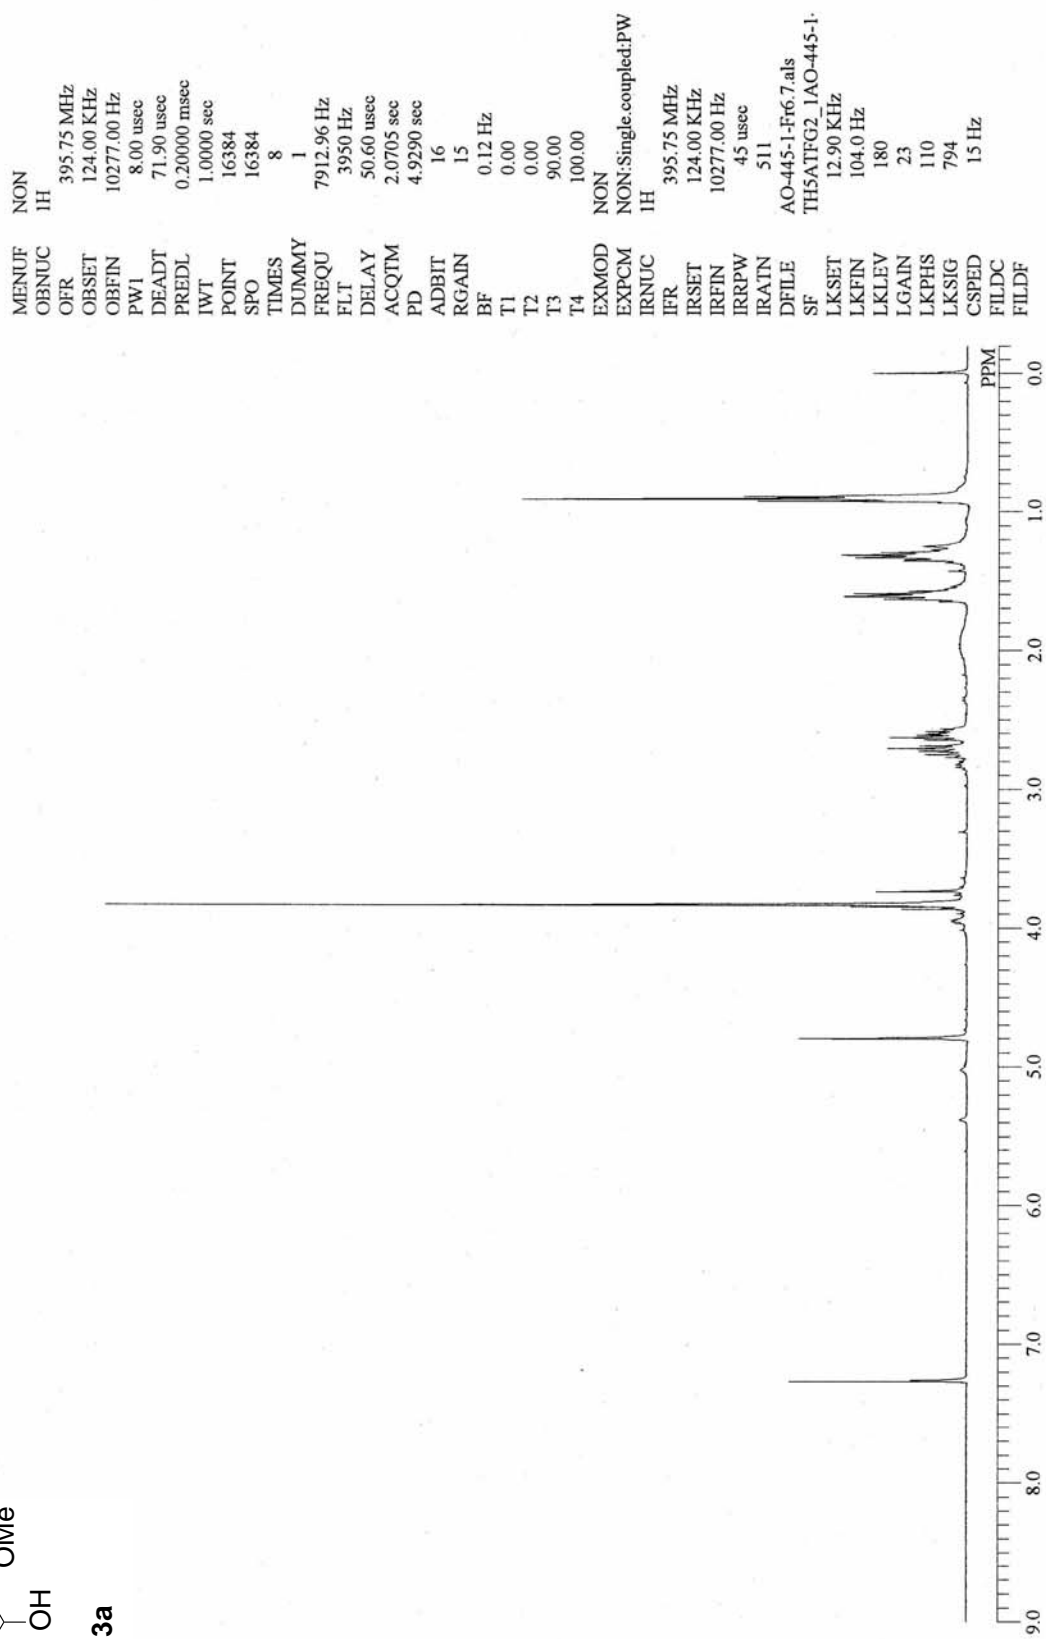

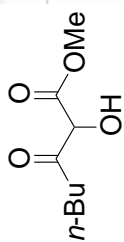

3a

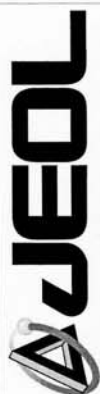

```

Filename      = AC-445 Fr7-14 13C-3.j
Author        = delta
Experiment     = SH482672
Sample        = CHLOROFORM-D
Solvent        = CHLOROFORM-D
Creation time  = 11-SEP-2015 13:23:41
Revision time  = 14-SEP-2015 15:31:31
Current time   = 14-SEP-2015 15:31:54

Comment       = AC-445 Fr7-14 13C
Data format    = 2D COMPLEX
Dir_name       = 16214
Dir_title      = 13C
Dim_units      = [ppm]
Dimensions     = X
Site           = ECA 500
Spectrometer   = JNM-ECA500

Field strength = 11.7473579[T] (500 MHz)
X_acq_duration = 0.83361792[s]
X_domain       = 125.76529768[MHz]
X_freq         = 125.76529768[MHz]
X_offset       = 100[ppm]
X_points       = 32768
X_prescans     = 4
X_resolution   = 1.19959034[Hz]
X_sweep        = 39.3081761[KHz]
Irr_domain     = 18.15991521[MHz]
Irr_freq       = 18.15991521[MHz]
Irr_offset     = 5.0[ppm]
Clipped        = FALSE
Mod return     = 1
Scans          = 128
Total_scans    = 128

X_90_width     = 10[us]
X_acq_time     = 0.83361792[s]
X_angle        = 5.0[deg]
X_p1           = 5.0[us]
X_pulse        = 3.33333333[us]
Irr_atn_dec    = 21.4479[db]
Irr_atn_noe    = 21.4479[db]
Irr_noise      = TRUE
Decoupling     = TRUE
Initial_wait   = 1[s]
Noe_time       = TRUE
Relaxation     = 5[s]
Relaxation_in  = 2[s]
Relaxation_delay = 2[s]
Repetition_time = 2.83361792[s]
Temp_get       = 21.7[degC]
  
```

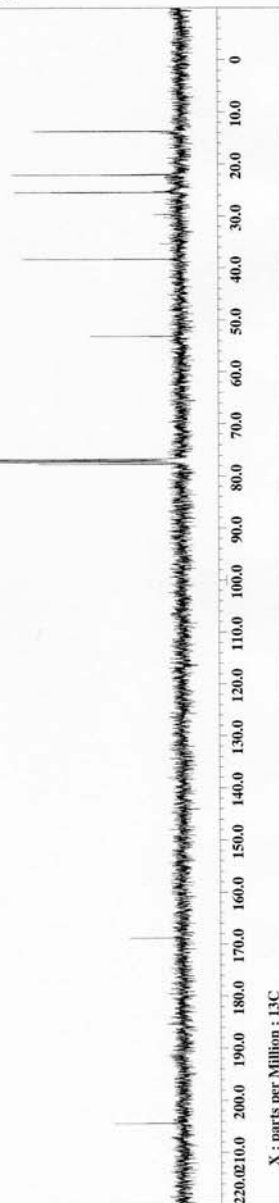

X : parts per Million : 13C
